1  
2  
3  
4  
5  
6  
7  
8  
9  
10  
11  
12  
13  
14  
15  
16  
17  
18  
19  
20  
21  
22  
23  
24  
25  
26

## Modulation of ADARs mRNA expression in congenital heart defect patients

Faiza Altaf<sup>1,#</sup>, Cornelia Vesely<sup>3,¶</sup>, Abdul Malik Sheikh<sup>2,&</sup>, Rubab Munir<sup>2,&</sup>, Syed Tahir  
Abbass Shah<sup>1,#,\*</sup>, Aamira Tariq<sup>1,#,\*</sup>

<sup>1#</sup>Department of Biosciences , Comsats Institute of Information Technology , Islamabad, Pakistan

<sup>2,&</sup>Rawalpindi Institute of Cardiology, Rawalpindi, Pakistan

<sup>3,¶</sup>Center for Anatomy and Cell Biology, Medical University Vienna, Schwarzschanerstrasse 17-I, 1090 Vienna,  
Austria.

\*Correspondence [aamira\\_tariq@comsats.edu.pk](mailto:aamira_tariq@comsats.edu.pk), [syedtahirabbas@comsats.edu.pk](mailto:syedtahirabbas@comsats.edu.pk)

## 27 **Abstract**

28 Adenosine (A) to inosine (I) RNA editing, is a hydrolytic deamination reaction catalyzed by  
29 adenosine deaminase (ADAR) acting on RNA enzymes. RNA editing is a molecular process that  
30 involves the post-transcriptional modification of RNA transcripts. Interestingly, few studies have  
31 been carried out to determine the role of RNA editing in vascular disease. The current study  
32 found that in blood samples positive for congenital heart disease (CHD) ADAR1 and ADAR2  
33 expression change at RNA level was opposite to each other. That is, an increase of ADAR1  
34 mRNA was noticed in human CHD cases, whereas ADAR2 mRNA was vastly down-regulated.  
35 The increase in ADAR1 may be explained by the stress induced by CHD. The dramatic decrease  
36 in ADAR2 in CHD cases was unexpected and prompted further investigation into its effects on  
37 the heart. Therefore we performed expression analysis on a microarray data encompassing  
38 ischemic and non-Ischemic cardiomyopathy patient myocardial tissues. A strong down-  
39 regulation of ADAR2 was observed in both ischemic and especially non-ischemic cases.  
40 However, ADAR1 showed a mild increase in the case of non-ischemic myocardial tissues. To  
41 further explore the role of ADAR2 with respect to heart physiology. We selected a protein  
42 coding gene filamin B (FLNB). FLNB is known to play an important role in heart development.  
43 Although there were no observable changes in its expression, the editing levels of FLNB  
44 dropped dramatically in ADAR2<sup>-/-</sup> mice. We also performed miRNA profiling from ADAR2<sup>-/-</sup>  
45 mice heart tissue revealed a decrease in expression of miRNAs. It is established that aberrant  
46 expression of these miRNAs is often associated with cardiac defects. This study proposes that  
47 sufficient amounts of ADAR2 might play a vital role in preventing cardiovascular defects.

48

## 49 **KEYWORDS**

50 Congenital heart defect, ADAR1, ADAR2, Cardiomyopathy

51

52

53

54

## 55 **Introduction**

56 Congenital Heart Disease (CHD) is defined as structural or functional heart defect. It belongs to  
57 a heterogeneous group of diseases and can be classified anatomically, clinically,  
58 epidemiologically and developmentally (1-3). The most common types of CHDs among  
59 hospitalized patients are VSD (Ventricular Septal Defects), TOF (Teratology of Fallot), PDA  
60 (Patent Ductus Arteriosus), TGA (Transposition of Arteries), ASD (Atrial Septal Defect) and  
61 CAVSD (Atrioventricular Septal Defect) (4). Recent studies indicate that 11% of Pakistani  
62 children die due to cardiac anomalies at the first postnatal month (5).. Genetic conditions or  
63 environmental factors such as maternal diabetes or rubella are identified in some cases but for  
64 most babies born with a heart defect the cause remain unknown(6).

65 The multi-lineage differentiation during cardiogenesis is orchestrated by a precise spatial and  
66 temporal regulation of gene expression. Genetic studies in humans and knockout embryos have  
67 identified various genes, such as *TBX5*, *NKX2-5*, *GATA4*, *CX43*, *NOTCH1* and *VEGF*  
68 responsible for sporadic and inherited CHD cases (7).

69 In humans, the most prevalent type of RNA editing is adenosine (A) to inosine (I) (8). This  
70 complex post-transcriptional hydrolytic deamination reaction is carried out by adenosine  
71 deaminase (ADAR) family of enzymes. This family acts on double stranded RNA and comprise  
72 of three members ADAR1, ADAR2 and ADAR3. ADAR1 ad ADAR2 are actively involved in  
73 adenosine deamination however, ADAR3 is non-functional (9). Different studies have shown  
74 that the extent of RNA editing not only varies among individuals but also show high tissue  
75 specificity. Approximately 2.5 million sites in human transcriptome undergo editing however a  
76 vast majority of them lie in the Alu elements located mostly in the introns and UTR (untranslated  
77 region) (10). However, the functional consequence of majority of RNA editing events still  
78 remain elusive. RNA editing is known to modulate splicing, coding potential, transcript stability  
79 and even alters the processing and targeting of the microRNAs (miRNA) (8, 11, 12). RNA  
80 editing process affects RNA stability by conversion of a stable A:U base pair to a relatively  
81 unstable I:U base pair followed by unwinding of the RNA duplex and making it susceptible to  
82 single strand specific RNases (11). Recent study focusing on RNA editing events in six different  
83 tissues have demonstrated an average of 79,976 editing sites in heart (10). Previous report  
84 focusing on cyanotic congenital heart disease has indicated a significant decline in ADAR2 RNA

85 level but no prominent difference in ADAR1 expression. Moreover, they showed high editing of  
86 MED13 in cyanotic CHD cases as opposed to acyanotic CHD patients (13). Recent study has  
87 shown an increase in expression of a lysosomal cysteine protease encoded by cathepsin S RNA  
88 (CTSS) via ADAR1 mediated RNA editing followed by HuR recruitment . Cathepsin S has a  
89 role in vascular inflammatory processes and the CTSS mRNA editing is increased in hypoxic or  
90 pro-inflammatory conditions as wells as in patients suffering from clinical or subclinical vascular  
91 damage (14).

92 In the current study we have determined the RNA level of ADAR1 and ADAR2 in congenital  
93 heart disease patients. We also checked the relative gene expression of FoxP1 which is an  
94 important transcription factor crucial for angiogenesis. We found a strong down-regulation of  
95 ADAR2 and an up-regulation of ADAR1. Interestingly, microarray data analysis of human non-  
96 ischemic myocardial tissues showed similar trend. Interestingly the ischemic myocardial tissues  
97 showed completely opposite trend. To further explore the role of ADAR2 in heart physiology,  
98 we used ADAR2 knockout mouse. Although no strong anomaly in heart physiology was  
99 observed as documented previously (15) however, we found down-regulation of different  
100 microRNAs.

101

## 102 **Materials and Methods**

### 103 **Collection of samples**

104 The blood samples were collected from 35 patients displaying different congenital heart defects  
105 from RIC (Rawalpindi institute of cardiology), stored in ice during transportation. Samples  
106 were segregated on the basis of age (3 months-16 years) and sex. Patient's echocardiography  
107 reports were consulted to confirm the presence of congenital heart defects and all sample  
108 collection was done pre-operatively. Whereas 13 control samples were collected from healthy  
109 individuals using same parameters. Interviews were conducted personally using the specified  
110 questionnaires. Information on age, gender, medication and family history was recorded.  
111 Perspective study was initiated after getting approval from ethical committees of both CIIT and  
112 collaborating hospitals.

### 113 **cDNA synthesis**

114 Five cubic centimeters of whole blood was collected from each patient in ethylenediamine  
115 tetraacetic acid (EDTA) test-tubes. To avoid RNA degradation, blood was kept at 4°C up to 24 h  
116 following collection before RNA was extracted. RNA extraction was carried out from peripheral  
117 blood mono-nuclear cells using the TRIzol® LS Reagent (Invitrogen, Germany) according to  
118 manufacturer's instruction. Optical density of the RNA was measured immediately following  
119 extraction. RNA samples showing A260/280 below 1.8 or above 2.0 were not taken for further  
120 analysis. One microgram of RNA was used for production of complementary DNA (cDNA)  
121 using Revert aid first strand cDNA synthesis kit (Thermo scientific, USA). A negative control  
122 was set up against each of the sample that lacked Reverse transcriptase and was termed as –RT  
123 (minus Reverse Transcriptase).

### 124 **Real time PCR**

125 The relative mRNA expression of genes were examined using a quantitative PCR with gene  
126 specific primer sets (IDT,USA and Macrogen, South Korea) and *TUBB1* was taken as internal  
127 control. 5x HOT FIREPol® EvaGreen® qPCR Mix plus (ROX) (Solis Bio Dyne, Tartu, Estonia)  
128 master mixed was used for qPCR reaction. Sequence was taken from ensemble and primers were  
129 synthesized by Integrated DNA Technology (**biotools.idtdna.com/Primer Quest**). The primers  
130 are listed in the supplementary table 1

### 131 **Statistical analysis**

132 Statistical analyses were performed with Graph-pad Prism 7.0b. For expression data, the target  
133 genes (*ADAR1*, *ADAR2*, *FOXPI*) CT was normalized with the control gene (*TUBI*) Ct.  
134 Depending on experiment, the statistical significance was determined using the Mann-Whitney  
135 test) with P< .05 considered significant.

136

### 137 **MicroArray analysis**

138 Micro array data analysis was performed using CARMA web tool (16) on the GEO data set  
139 GDS1362 (17)focusing on expression analysis from myocardial tissues of non-ischemic (NICM),

140 Ischemic cardiomyopathy (ICM) patients as opposed to non-failing heart tissues. The raw micro  
141 array data was extracted and normalization of the data was performed by gcRMA package.

## 142 **Mice**

143 The *Adar2*<sup>-/-</sup> knockout mouse was a kind gift of Peter Seeburg. These transgenic mice are in an  
144 SV129 background. As ADAR2 deficiency leads to early postnatal lethality, the mice were  
145 rescued with a pre-edited Gria2 receptor (*Gria2*<sup>R/R</sup>) (18, 19). Mice were bred in Vienna Biocentre  
146 facility animal house. *Gria2*<sup>R/R</sup>; *ADAR2*<sup>+/-</sup> were intercrossed. The resulting sibling female  
147 offspring of genotype *Gria2*<sup>R/R</sup>; *Adar2*<sup>-/-</sup> and *Gria2*<sup>R/R</sup>; *ADAR2*<sup>+/+</sup> was euthanized at the age of  
148 post natal day 6 (P6). Whole heart was dissected and subsequently used for RNA preparation  
149 from three biological replicates (18, 20).

150

## 151 **RNA extraction and miRNA cloning**

152 Female mouse whole heart as dissected at the age of post natal day 6 (P6), homogenized and  
153 total RNA was extracted using TriFast reagent according to manufacturer's instructions  
154 (PEQLAB Biotechnologie GmbH, Erlangen, Germany). miRNA library preparation was  
155 performed as previously described (21).

156

## 157 **Sequencing and clipping of reads**

158 Completed libraries were quantified with the Agilent Bioanalyzer dsDNA 1000 assay kit and  
159 Agilent QPCR NGS library quantification kit. Cluster generation and sequencing was carried out  
160 using the Illumina Genome Analyzer IIx system according to the manufacturer's guidelines.  
161 Illumina sequencing was performed at the CSF NGS Unit (csf.ac.at). After sequencing at a read  
162 length of 36 base pairs, adaptor sequences were removed using Cutadapt (22).

## 163 **Mapping to mature miRNA sequences**

164 Mapping of clipped reads to mature miRNA sequences was performed as described previously  
165 Mapping was performed using NextGenMap, restricting the mapped reads to have at least 90%  
166 identity (# differences/alignment length) (23).

## 167 **Results**

### 168 **ADAR2 has the lowest expression in CHD patients**

169 RNA was extracted from 35 affected congenital heart disease patients and 13 normal individuals  
170 were taken as control. Most of the patients had VSD (Ventricular septal defects). All CHD  
171 samples were pre-operative cases. Since recent reports indicated, that RNA editing might be  
172 involved in cardiogenesis (13, 14). We checked the expression of the functional RNA editing  
173 enzymes using quantitative realtime PCR (qPCR). A significant decline in ADAR2 expression  
174 was observed. However, on the contrary, ADAR1 showed a significant increase (Figure 1a). The  
175 observed elevated ADAR1 expression is in line with the recent finding demonstrating higher  
176 ADAR1 expression in the human patients undergoing carotid endarterectomy operation(14). As a  
177 control for CHD, we selected a member of fork head box family of transcription factor (FoxP1).  
178 FoxP1 has a critical role in murine as well as human heart development. It showed high  
179 expression during embryonic stages as opposed to postnatal stage and is critical for  
180 cardiomyocyte proliferation (24). We found a significant decrease in FoxP1 expression  
181 confirming that the RNA extracted from the blood of CHD patients can depict the expression  
182 differences between normal and patient samples. Surprisingly out of these three genes, ADAR2  
183 was strongly down-regulated (Figure 1) pointing towards its expression modulation in relation to  
184 heart disease.

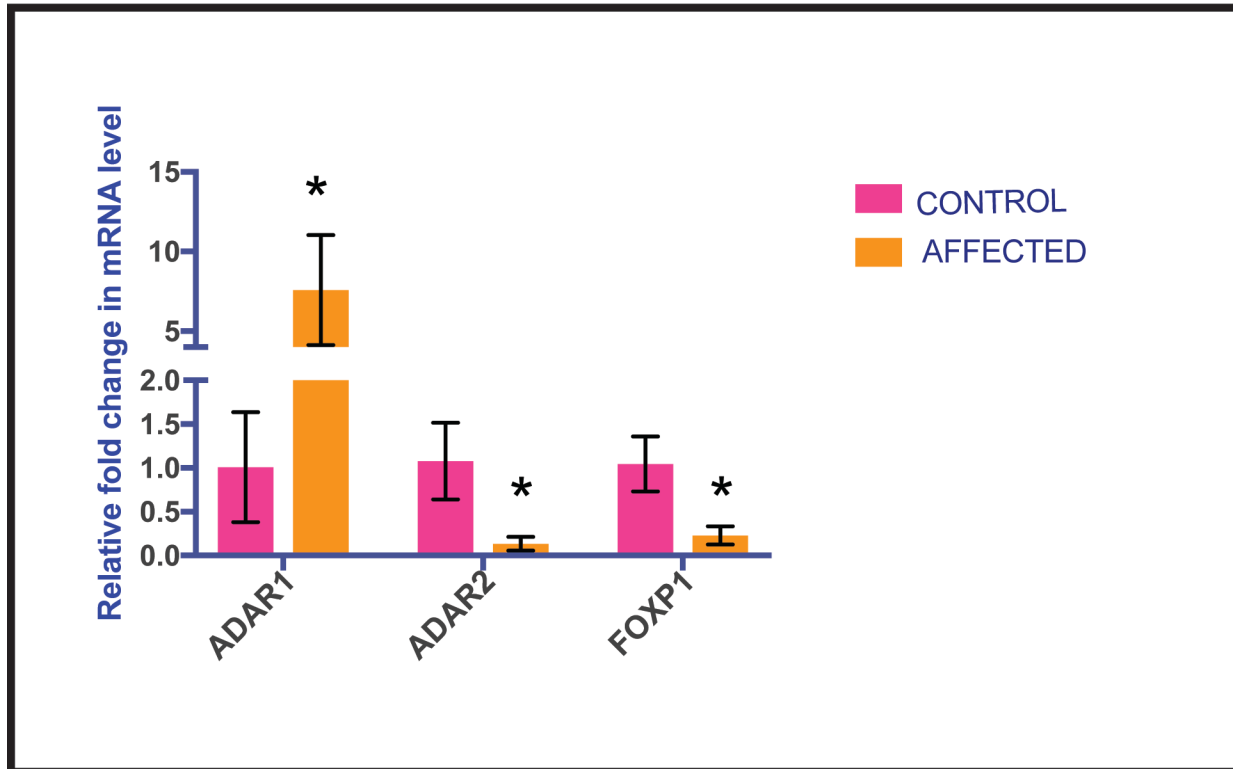

185

186 **Figure 1. ADAR2 has the lowest expression in CHD patients:** Bar graph showing relative  
187 RNA level of ADAR1, ADAR2 and FOXP1 as opposed to control. ADAR2 and FOXP1 show a  
188 significant reduced expression at RNA level whereas ADAR1 shows upregulation. \* $P < 0.05$   
189 (versus control) was determined by Mann–Whitney  $U$  test.

190

### 191 **Heart defect specific function**

192 We further investigated whether this increase in ADAR1 is specific for a heart defect. As in our  
193 study the patients were suffering from different forms of congenital heart disease. ADAR1 was  
194 strongly up-regulated in ASD followed by VSD. However, it shows approximately 3fold  
195 increase- in TOF and CAVSD (Figure 2a and d). On the contrary, ADAR2 shows a strong  
196 significant decline in CAVSD, TOF and VSD. (Figure 2b and d). This specificity of gene  
197 expression of ADAR1 and ADAR2 with heart defects can be answered by the differences in the  
198 cardiac myocytes. Atrial, ventricular and nodal cells are morphologically, molecularly and  
199 functionally distinct. We propose that ADAR1 might have a more critical function in atrium  
200 development as compared to ventricles whereas ADAR2 might be more crucial for ventricular



201 development. In the case of FOXP1, the most prominent decline was observed in the TOF  
202 patient samples (Figure 2c and d). FOXP1 plays a critical role in maintaining a balance of  
203 cardiomyocyte proliferation and differentiation via regulation of Fgf ligand and modulation of  
204 Nkx2.5 expression (25). This might answer the observed an increase in ADAR1 mRNA level and  
205 a strong decrease in FOXP1 expression.

206

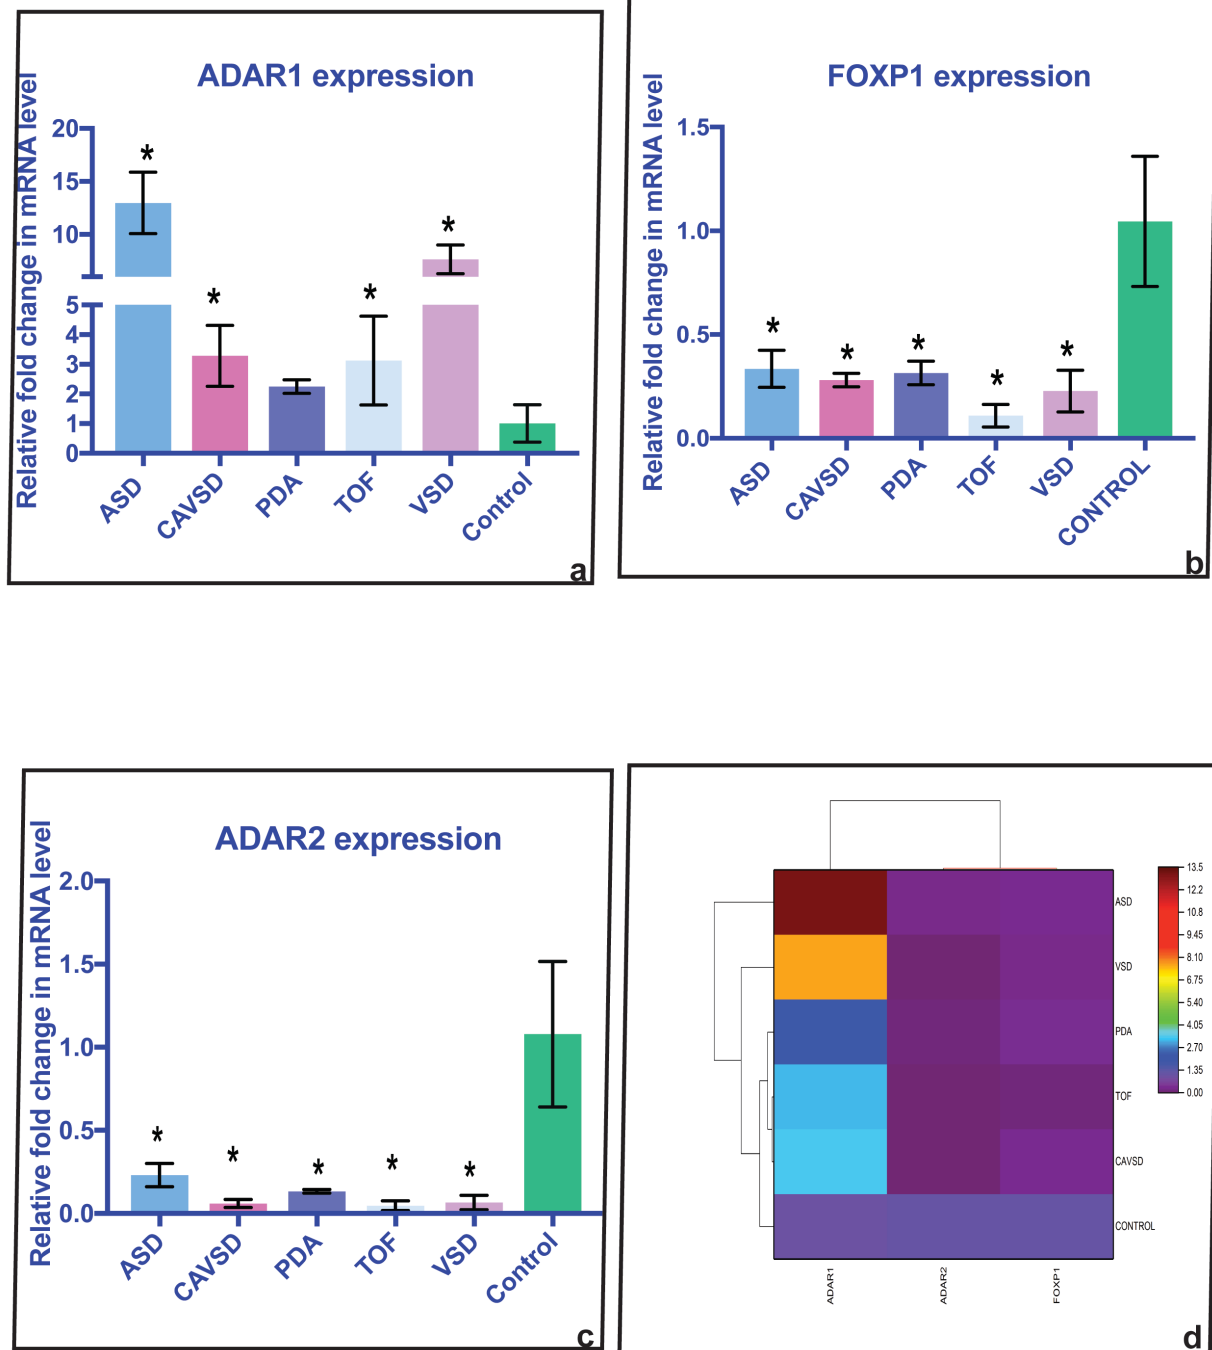

207

208 **Figure 2. Heart defect specific function a.** Bar graph showing up-regulation of ADAR1 in  
209 different CHD cases. ADAR1 is significantly up-regulated in ASD and VSD. However, 3-4 fold  
210 increase at RNA level was found in AVSD and TOF cases. The PDA cases did not show a  
211 significant change. \* $P < 0.05$  (versus control) was determined by Mann-Whitney  $U$  test.

212 **b.** Bar graph showing strong decline in ADAR2 expression particularly in AVSD, TOF and  
213 VSD. ADAR2 is significantly down-regulated in all CHD cases.  $*P < 0.05$  (versus control) was  
214 determined by Mann–Whitney *U* test.

215 **c.** Bar graph showing reduced expression of FOXP1 in CHD cases. The strongest decline was  
216 observed in TOF samples.  $*P < 0.05$  (versus control) was determined by Mann–Whitney *U* test.

217 **d.** Heat map showing expression level of ADAR1, ADAR2 and FOXP1 as opposed to control in  
218 different CHD cases.

219

### 220 **ADAR1, ADAR2 and Cardiomyopathy**

221 Since all the above-mentioned results, were observed only in PBMCs we performed microarray  
222 data analysis on the Geo Dataset GDS1362 (17). This dataset comprised of differentially  
223 expressed genes in myocardial tissues from non-failing heart, ischemic and non-ischemic  
224 cardiomyopathy patients. We found a similar trend of expression of ADAR1 and ADAR2 in  
225 myocardial tissues from non-ischemic patients. ADAR1 showed a slight but significant increase  
226 whereas ADAR2 showed a strong decline in expression. Interestingly we found that the  
227 decrease in expression of ADAR2 was more prominent in non-ischemic as opposed to ischemic  
228 myocardial tissues (Figure 3).

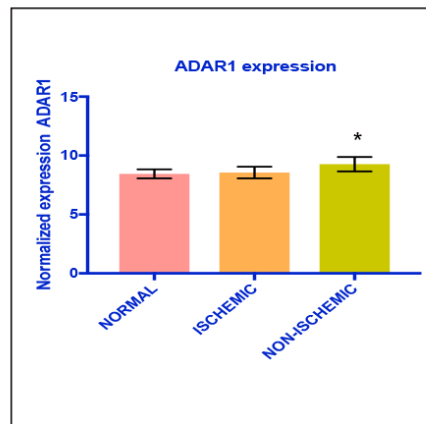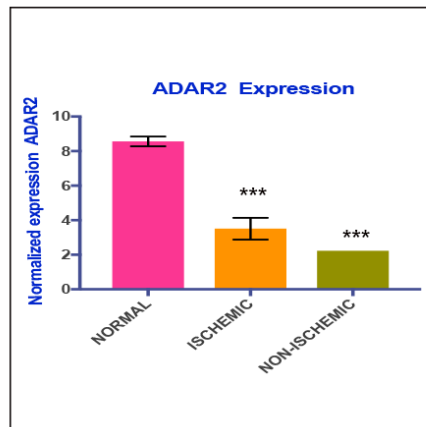

229

230 **Figure 3 (a)** Bar graph showing slight increase in ADAR1 expression in ischemic myocardial  
231 tissues from cardiomyopathy patients.

232 **(a)** Bar graph showing significant decrease in ADAR2 expression in ischemic and non-ischemic  
233 myocardial tissues from cardiomyopathy patients.

234 \* $P < 0.05$  (versus control) was determined by Mann–Whitney  $U$  test.

235

## 236 **Filamins and Cardiac Defects**

237 The strong decrease of ADAR2 expression in CHD patients made us curious to further  
238 investigate what happens in ADAR2<sup>-/-</sup> mice heart?. Actin binding proteins such as FLNA and  
239 FLNB play essential role in the vascular development. FLNA is ubiquitously expressed whereas  
240 FLNB expression is mainly in the endothelial cells (26). Complete loss of FLNA results in  
241 severe structural defects in the heart involving atria, ventricles and outflow tracts (27). The  
242 decrease in ADAR2 mRNA level in CHD patients has urged us to look for protein coding targets  
243 that play significant role in cardiac development. Therefore, we chose FLNB. FLNA has been  
244 previously reported as ADAR2 editing target in the heart. Editing of FLNA drops down  
245 dramatically in ADAR2<sup>-/-</sup> mice heart (28). FLNB shows highest editing in the heart as compared  
246 to other tissues (28). Therefore, we checked the expression and editing of FLNB in the absence  
247 of ADAR2. We observed a dramatic decrease of 24% in editing of FLNB in ADAR2<sup>-/-</sup> mice  
248 heart (Figure 4).

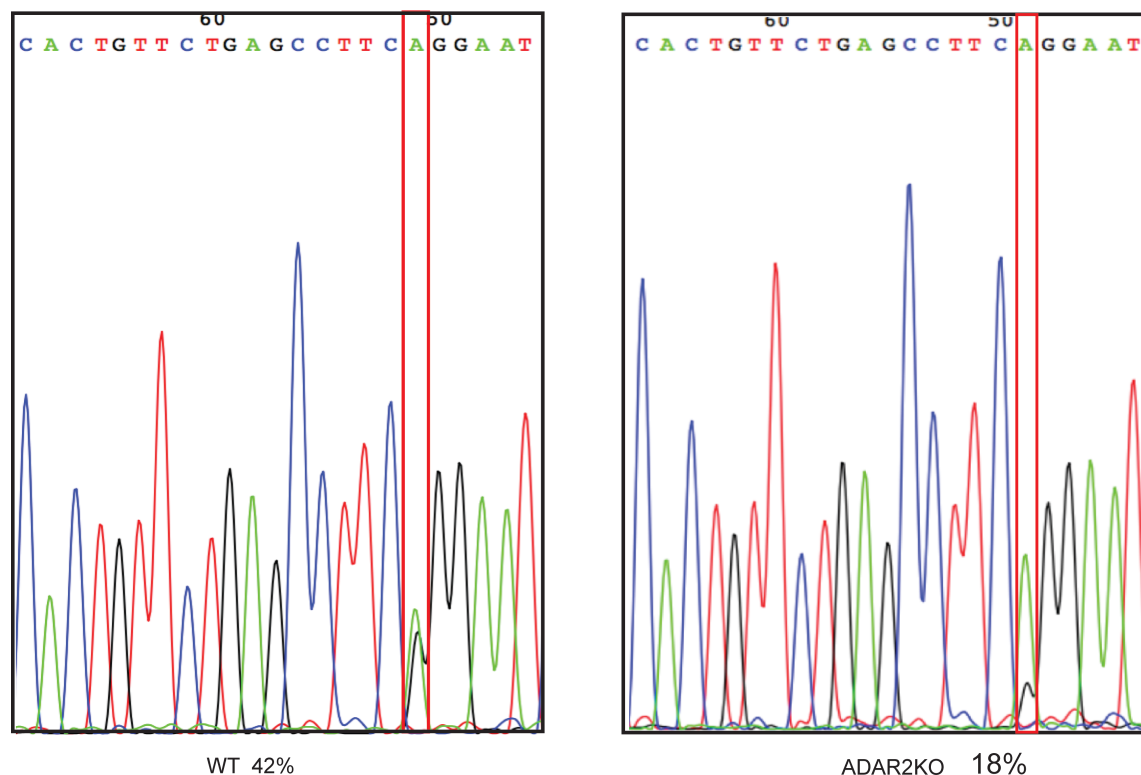

250 **Figure 4. FLNB editing in ADAR2 KO mouse:** Electropherogram showing 24% decrease in  
251 editing as compared to WT mouse

252 To our surprise, we did not observe any change in expression of FLNB in the ADAR2<sup>-/-</sup> mice  
253 heart as compared to wild type mice heart (Figure 5). This indicates that edited FLNB might  
254 have a specific function.

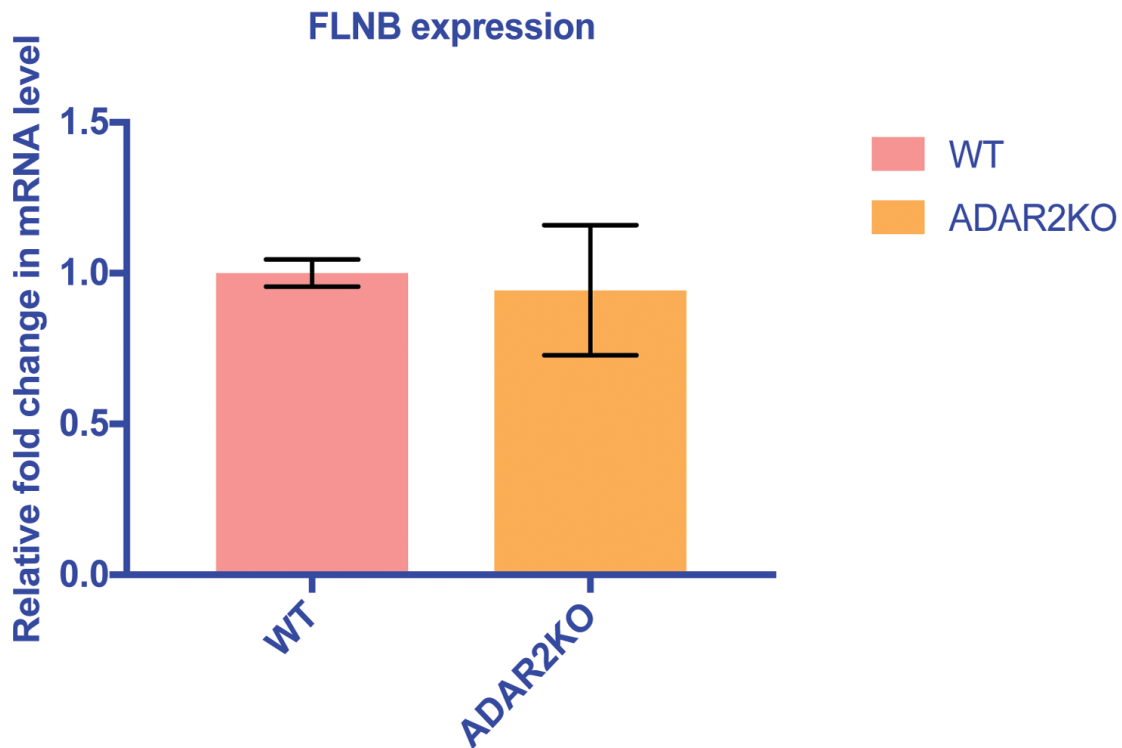

255 **Figure 5. FLNB expression in the ADAR2 KO mouse heart:** Bar graph showing no  
256 significant change in expression of FLNB in the heart on ADAR2  
257

258

#### 259 **ADAR1 expression in ADAR2 KO mouse heart**

260 Since increase in ADAR1 has been found in CHD patients. We determined whether this  
261 observed increase in ADAR1 is due to deregulation of ADAR2. Therefore, we determined  
262 ADAR1 level in the absence of ADAR2. We did not find any significant change in ADAR1 level  
263 (Figure 6). Therefore, we can conclude that the observed increase in ADAR1 is solely because of  
264 the CHD defect.

265

266

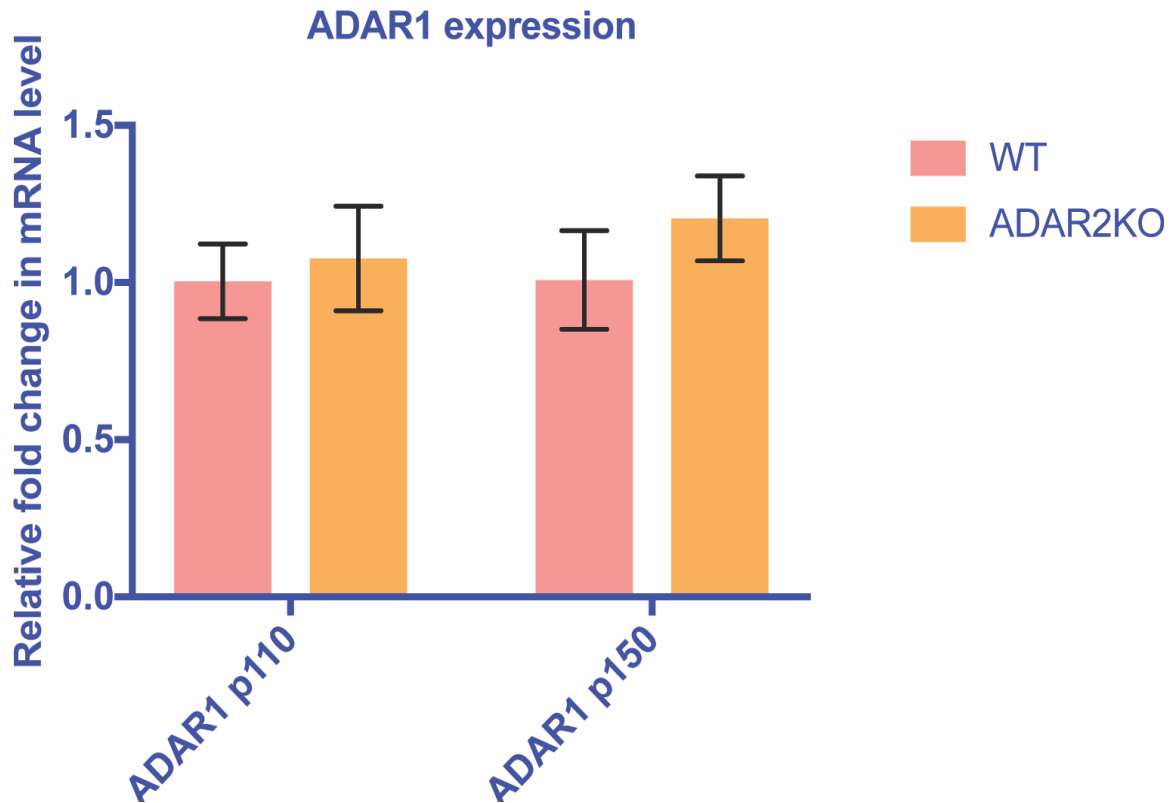

267

268

269 **Figure 6. ADAR1 isoforms expression in ADAR2 KO mouse:** Bar graph showing no  
270 significant change in expression of ADAR1 isoforms (p110 and p150) in the heart on ADAR2

271

#### 272 **ADAR2<sup>-/-</sup> heart shows down-regulation of miR-29b**

273 A previous study focusing on ADAR2<sup>-/-</sup> mice showed a statistically significant decrease in heart  
274 rate (15). We performed RNA sequencing of ADAR2<sup>-/-</sup> mice heart samples in triplicates and  
275 observed approximately ~2-fold decrease in miR-29b level consistently at P6 stage.  
276 Approximately 1.5 fold down-regulation has been observed for miR451-b, miR451-a, miR19b,  
277 (Table 1). To our surprise, we did not observe any up-regulated miRNAs. Quantitative trait loci  
278 (QTLs) associated with miR-29 a and b show their potential involvement in cardiac diseases  
279 (29). miR-29 family shows strong expression in lung, kidney and the heart. It expresses  
280 predominantly approximately 5-12 folds in cardiac fibroblasts as compared to cardiomyocytes.  
281 Moreover, the miR-29 family is down-regulated in fibrotic scars after myocardial infarction and

282 can lead to cardiac fibrosis by boosting collagen expression. miR29-b has an antifibrosis role as  
 283 it targets promoters of several extracellular matrix genes (30). Recent reports have documented a  
 284 cardioprotective role of miR29-b. miR 29b inhibits angiotensin II induced cardiac fibrosis by  
 285 targeting TGF-  $\beta$  /Smad3 pathway (31).

286 After miR-29b, miR-451(a and b), miR-19b1 and different members of let-7, family also showed  
 287 down-regulation in ADAR2 knockout mice heart However, they showed significant but small  
 288 down-regulation of only about 1-1.5 fold (Table -1). Aberrant expression of let-7 family has been  
 289 linked to diverse cardiovascular diseases such as fibrosis, hypertrophy, dilated cardiomyopathy  
 290 (DM), myocardial infarction (MI), atherosclerosis and hypertension (32). This down regulation  
 291 of microRNAs on ADAR2 knock-out point towards a potential regulatory mechanism mediated  
 292 by ADAR2 in the heart development and physiology.

293

| Sr.No. | miRNA    | Log2 Fold change | Pvalue   | Reference |
|--------|----------|------------------|----------|-----------|
| 1      | miR-29b  | -1.97            | 0.001599 | (33)      |
| 2      | miR-451b | -1.51            | 0.005    | (34)      |
| 3      | miR-451a | -1.51            | 0.005    | (34)      |
| 4      | miR-19b1 | -1.48            | 0.015    | (33)      |
| 5      | let7c-2  | -1.47            | 0.0017   | (35)      |
| 6      | let7c-1  | -1.39            | 0.003    | (35)      |
| 7      | let7-i   | -1.23            | 0.01     | (35)      |
| 8      | let7-b   | -1.23            | 0.01     | (35)      |
| 9      | miR-382  | -1.21            | 0.04     |           |
| 10     | miR-26a  | -1.19            | 0.03     |           |
| 11     | miR-378  | -1.19            | 0.011    | (36)      |
| 12     | miR-378a | -1.14            | 0.019    | (36)      |
| 13     | miR-130a | -1.09            | 0.024    | (37)      |

294



295 **Table 1. miRNAs significantly downregulated in ADAR2<sup>-/-</sup> mice heart as compared to wild type**

296

## 297 **Discussion**

298 Adenosine deamination by ADARs is a post-transcriptional event that can diversify the  
299 transcripts both at sequence as well as structure level. The deregulation of editing has been  
300 associated with number of diseases (8, 13, 33).

301 ADARs play a significant role in development. Moreover the tissue and site specific editing  
302 largely affects the differential expression of substrate transcripts (38, 39). In our study, we found  
303 a strong down-regulation of ADAR2 and a strong increase in ADAR1 in ASD and VSD patient  
304 samples. This observation is in line with previous finding demonstrating increased CTSS mRNA  
305 editing due to up-regulation of ADAR1 in human atherosclerotic plaques (14). Since the  
306 expression analysis was performed only on the PBMCs from normal and CHD patients we  
307 further extended our study to myocardial tissues. Expression analysis of myocardial tissues from  
308 ischemic and non-ischemic patients showed a significant decline in ADAR2 expression level  
309 (Figure 3). This result supported our finding that ADAR2 not only down-regulates in PBMCS  
310 but also showed decreased expression in human cardiomyopathy tissues.

311 The stong downregulation of ADAR2 with respect to heart disease urged us to further explore  
312 what heart related processes might be ADAR2 regulating? To address this query, we used  
313 ADAR2 knock out mouse. We chose FLNB which plays an essential role in the heart however  
314 lack of ADAR2 strongly decreased its editing. We did not observe any change in FLNB  
315 expression in the absence of ADAR2. The increase on ADAR1 in the PBMCs and the  
316 simultaneous downregulation of ADAR2 posed a question whether the observed effect is  
317 because of ADAR2 or is it the consequence of CHD? We observed no significant change in  
318 expression of the ADAR1 isoforms in the absence of ADAR2. This shows that CHD might be  
319 triggering an inflammatory response leading to increase in ADAR1. The elevated ADAR1  
320 expression in atherosclerosis has been documented previously (14).

321 ADARs can modulate microRNA processing and also are capable of retargeting the microRNA  
322 to different substrate (35). Like ADAR1, ADAR2 also can modulate microRNA processing.  
323 Since a number of micro RNAs like miR-1, miR-423 are associated with heart disease we

324 thought of investigating the microRNA profile in ADAR2 knock out mouse heart (40).  
325 Surprisingly, we did not observe any up-regulated micro RNAs in the ADAR2<sup>-/-</sup> mice heart.  
326 However, we observed a decline of ~1.5-2 fold in miR-29b, miR-451, miR19 and members of let  
327 -7 family (Table 1).

328 miR-29b family regulates a plethora of proteins at RNA level that are involved in cardiac  
329 fibrosis. This family has highest expression in the heart fibroblast population and comprises of  
330 three members miR-29a, miR-29b and miR-29c. miR-29b differs only by one base from miR-  
331 29a and miR-29c. Among the three members, miR-29b expresses strongly in cardiac fibroblasts  
332 as opposed to miR-29a and miR-29c.(30). Angiotensin-II (Ang-II) induced hypertensive cardiac  
333 fibrosis in-vivo and in-vitro is associated with cardiac fibrosis. miR-29b inhibits activation  
334 ERK1/2 by preventing its phosphorylation. miR-29b suppresses the TGF- $\beta$  /Smad-ERK-MAP  
335 kinase crosstalk (31). Two members of miR-451 a and b show down-regulation by 1.5 fold. miR-  
336 451is down-regulated in the heart tissues from hypertrophic cardiomyopathy patients. It directly  
337 targets tuberous sclerosis complex 1 (TSC1) and inhibits formation of auto-phagosomes and  
338 cardiac hypertrophy (41). Another microRNA, miR-19b belongs to miR-17-92 cluster. The  
339 decreased expression of miR-19b is correlated with cardiovascular diseases (42). miR-19b  
340 overexpression promotes differentiation by stimulating cell proliferation and inhibiting Wnt- $\beta$ -  
341 catenin pathway consequently blocking apoptosis of cardiac P19 cells(43).

342 Apart from the above mentioned microRNAs, some members of let7 family like let7-c, let-7-i  
343 and let7-b are down-regulated approximately 1.2-1.4 fold. The human let-7 family comprises of  
344 13 members. Let7-c is elevated in endothelial to mesenchymal transition (EndMT) (32). It  
345 shows reduced expression in coronary artery disease patients as opposed to control (44). Let7-i  
346 limits the toll like receptors like TLR4 by targeting it. (45) and is down-regulated in dilated  
347 cardiomyopathy (32).

348 Most of the down-regulated microRNAs on ADAR2 knock down in our study are related with  
349 cardiovascular disorders. This implies that ADAR2 might have a cardio-protective function as  
350 these microRNAs are mostly reduced in different cardiac defects. The increase in ADAR1 in  
351 CHD cases is in line with previous finding of elevated ADAR1 expression in endothelial cells  
352 stress response and atherosclerosis (14).

353 **Acknowledgments**

354 We thank Peter Seeburg (MPI, Heidelberg) for the kind gift of Adar2<sup>-/-</sup> knockout mice and  
355 Dr. Michael Jantsch (Medical University, Vienna) for supporting the microRNA work. This work  
356 was supported by the Higher Education Commission startup grant IPFP/HRD/HEC/2014/1622.  
357 We thank Kate Middleton, for reviewing the manuscript.

358

359

360

361 **References**

- 362 1. Hobbs CA, Cleves MA, Melnyk S, Zhao W, James SJ. Congenital heart defects and abnormal  
363 maternal biomarkers of methionine and homocysteine metabolism. *The American journal of clinical*  
364 *nutrition*. 2005;81(1):147-53.
- 365 2. Botto LD, Mulinare J, Erickson JD. Do multivitamin or folic acid supplements reduce the risk for  
366 congenital heart defects? Evidence and gaps. *American Journal of Medical Genetics Part A*.  
367 2003;121(2):95-101.
- 368 3. Verkleij-Hagoort AC, Verlinde M, Ursem NT, Lindemans J, Helbing WA, Ottenkamp J, et al.  
369 Maternal hyperhomocysteinaemia is a risk factor for congenital heart disease. *BJOG: An International*  
370 *Journal of Obstetrics & Gynaecology*. 2006;113(12):1412-8.
- 371 4. Al-Hamash SM. Pattern of congenital heart disease: a hospitalbased study. *Al Kindy College*  
372 *Medical Journal*. 2006;3:44-8.
- 373 5. Pathan IH, Bangash SK, Khawaja AM. SPECTRUM OF HEART DEFECTS IN CHILDREN PRESENTING  
374 FOR PAEDIARIC CARDIAC SURGERY. *Pakistan Heart Journal*. 2016;49(1).
- 375 6. Botto LD, Lynberg MC, Erickson JD. Congenital heart defects, maternal febrile illness, and  
376 multivitamin use: a population-based study. *Epidemiology*. 2001;12(5):485-90.
- 377 7. Bruneau BG. The developmental genetics of congenital heart disease. *Nature*.  
378 2008;451(7181):943-8.
- 379 8. Tariq A, Jantsch MF. Transcript diversification in the nervous system: A to I RNA-editing in CNS  
380 function and disease development. *Frontiers in neuroscience*. 2012;6:99.
- 381 9. Tariq A, Jantsch MF. Transcript diversification in the nervous system: A to I RNA editing in CNS  
382 function and disease development. *Frontiers in neuroscience*. 2012;6.
- 383 10. Picardi E, Manzari C, Mastropasqua F, Aiello I, D'Erchia AM, Pesole G. Profiling RNA editing in  
384 human tissues: towards the inosinome Atlas. *Scientific reports*. 2015;5:14941.
- 385 11. Wang IX, So E, Devlin JL, Zhao Y, Wu M, Cheung VG. ADAR regulates RNA editing, transcript  
386 stability, and gene expression. *Cell reports*. 2013;5(3):849-60.
- 387 12. Nishikura K. A-to-I editing of coding and non-coding RNAs by ADARs. *Nature reviews Molecular*  
388 *cell biology*. 2016;17(2):83-96.
- 389 13. Borik S, Simon AJ, Nevo-Caspi Y, Mishali D, Amariglio N, Rechavi G, et al. Increased RNA editing  
390 in children with cyanotic congenital heart disease. *Intensive care medicine*. 2011;37(10):1664.
- 391 14. Stellos K, Gatsiou A, Stamatelopoulos K, Matic LP, John D, Lunella FF, et al. Adenosine-to-inosine  
392 RNA editing controls cathepsin S expression in atherosclerosis by enabling HuR-mediated post-  
393 transcriptional regulation. *Nature Medicine*. 2016.

- 394 15. Horsch M, Seeburg PH, Adler T, Aguilar-Pimentel JA, Becker L, Calzada-Wack J, et al.  
395 Requirement of the RNA-editing enzyme ADAR2 for normal physiology in mice. *Journal of Biological*  
396 *Chemistry*. 2011;286(21):18614-22.
- 397 16. Rainer J, Sanchez-Cabo F, Stocker G, Sturn A, Trajanoski Z. CARMAweb: comprehensive R-and  
398 bioconductor-based web service for microarray data analysis. *Nucleic acids research*.  
399 2006;34(suppl\_2):W498-W503.
- 400 17. Kittleson MM, Minhas KM, Irizarry RA, Ye SQ, Edness G, Breton E, et al. Gene expression analysis  
401 of ischemic and nonischemic cardiomyopathy: shared and distinct genes in the development of heart  
402 failure. *Physiological genomics*. 2005;21(3):299-307.
- 403 18. Brusa R, Zimmermann F, Koh D-S, Feldmeyer D, Gass P, Seeburg PH, et al., editors. Early-onset  
404 epilepsy and postnatal lethality associated with an editing-deficient GluR-B allele in mice. *Cold Spring*  
405 *Harbor Symp Quant Biol*; 1995: JSTOR.
- 406 19. Higuchi M, Maas S, Single FN, Hartner J, Rozov A, Burnashev N, et al. Point mutation in an AMPA  
407 receptor gene rescues lethality in mice deficient in the RNA-editing enzyme ADAR2. *Nature*.  
408 2000;406(6791):78-81.
- 409 20. Hartner JC, Schmittwolf C, Kispert A, Müller AM, Higuchi M, Seeburg PH. Liver disintegration in  
410 the mouse embryo caused by deficiency in the RNA-editing enzyme ADAR1. *Journal of Biological*  
411 *Chemistry*. 2004;279(6):4894-902.
- 412 21. Vesely C, Tauber S, Sedlazeck FJ, von Haeseler A, Jantsch MF. Adenosine deaminases that act on  
413 RNA induce reproducible changes in abundance and sequence of embryonic miRNAs. *Genome research*.  
414 2012;22(8):1468-76.
- 415 22. Martin M. Cutadapt removes adapter sequences from high-throughput sequencing reads.  
416 *EMBnet journal*. 2011;17(1):pp. 10-2.
- 417 23. Sedlazeck FJ, Rescheneder P, Von Haeseler A. NextGenMap: fast and accurate read mapping in  
418 highly polymorphic genomes. *Bioinformatics*. 2013;29(21):2790-1.
- 419 24. Chang SW, Mislankar M, Misra C, Huang N, DaJusta DG, Harrison SM, et al. Genetic  
420 abnormalities in FOXP1 are associated with congenital heart defects. *Human mutation*.  
421 2013;34(9):1226-30.
- 422 25. Zhang Y, Li S, Yuan L, Tian Y, Weidenfeld J, Yang J, et al. Foxp1 coordinates cardiomyocyte  
423 proliferation through both cell-autonomous and nonautonomous mechanisms. *Genes & development*.  
424 2010;24(16):1746-57.
- 425 26. del Valle-Pérez B, Martínez VG, Lacasa-Salavert C, Figueras A, Shapiro SS, Takafuta T, et al.  
426 Filamin B plays a key role in vascular endothelial growth factor-induced endothelial cell motility through  
427 its interaction with Rac-1 and Vav-2. *Journal of Biological Chemistry*. 2010;285(14):10748-60.
- 428 27. Feng Y, Chen MH, Moskowitz IP, Mendonza AM, Vidali L, Nakamura F, et al. Filamin A (FLNA) is  
429 required for cell-cell contact in vascular development and cardiac morphogenesis. *Proceedings of the*  
430 *National Academy of Sciences*. 2006;103(52):19836-41.
- 431 28. Stulić M, Jantsch MF. Spatio-temporal profiling of Filamin A RNA-editing reveals ADAR  
432 preferences and high editing levels outside neuronal tissues. *RNA biology*. 2013;10(10):1611-7.
- 433 29. Arnold N, Koppula PR, Gul R, Luck C, Pulakat L. Regulation of cardiac expression of the diabetic  
434 marker microRNA miR-29. *PLoS One*. 2014;9(7):e103284.
- 435 30. Van Rooij E, Sutherland LB, Thatcher JE, DiMaio JM, Naseem RH, Marshall WS, et al.  
436 Dysregulation of microRNAs after myocardial infarction reveals a role of miR-29 in cardiac fibrosis.  
437 *Proceedings of the National Academy of Sciences*. 2008;105(35):13027-32.
- 438 31. Zhang Y, Huang X-R, Wei L-H, Chung AC, Yu C-M, Lan H-Y. miR-29b as a therapeutic agent for  
439 angiotensin II-induced cardiac fibrosis by targeting TGF- $\beta$ /Smad3 signaling. *Molecular Therapy*.  
440 2014;22(5):974-85.

- 441 32. Bao M-H, Feng X, Zhang Y-W, Lou X-Y, Cheng Y, Zhou H-H. Let-7 in cardiovascular diseases, heart  
442 development and cardiovascular differentiation from stem cells. *International journal of molecular*  
443 *sciences*. 2013;14(11):23086-102.
- 444 33. Tomaselli S, Galeano F, Alon S, Raho S, Galardi S, Polito VA, et al. Modulation of microRNA  
445 editing, expression and processing by ADAR2 deaminase in glioblastoma. *Genome biology*. 2015;16(1):5.
- 446 34. Liu D, Liu C, Wang X, Ingvarsson S, Chen H. Universal RNA editing in a human liver at the fetal  
447 stage. 2012.
- 448 35. Chawla G, Sokol NS. ADAR mediates differential expression of polycistronic microRNAs. *Nucleic*  
449 *acids research*. 2014;42(8):5245-55.
- 450 36. Vesely C, Tauber S, Sedlazeck FJ, Tajaddod M, Haeseler Av, Jantsch MF. ADAR2 induces  
451 reproducible changes in sequence and abundance of mature microRNAs in the mouse brain. *Nucleic*  
452 *acids research*. 2014;42(19):12155-68.
- 453 37. Ekdahl Y, Farahani HS, Behm M, Lagergren J, Öhman M. A-to-I editing of microRNAs in the  
454 mammalian brain increases during development. *Genome research*. 2012;22(8):1477-87.
- 455 38. Huntley MA, Lou M, Goldstein LD, Lawrence M, Dijkgraaf GJ, Kaminker JS, et al. Complex  
456 regulation of ADAR-mediated RNA-editing across tissues. *BMC genomics*. 2016;17(1):61.
- 457 39. Tariq A, Garncarz W, Handl C, Balik A, Pusch O, Jantsch MF. RNA-interacting proteins act as site-  
458 specific repressors of ADAR2-mediated RNA editing and fluctuate upon neuronal stimulation. *Nucleic*  
459 *acids research*. 2012;41(4):2581-93.
- 460 40. Paul D, Sinha AN, Ray A, Lal M, Nayak S, Sharma A, et al. A-to-I editing in human miRNAs is  
461 enriched in seed sequence, influenced by sequence contexts and significantly hypoadedited in  
462 glioblastoma multiforme. *Scientific Reports*. 2017;7.
- 463 41. Song L, Su M, Wang S, Zou Y, Wang X, Wang Y, et al. MiR-451 is decreased in hypertrophic  
464 cardiomyopathy and regulates autophagy by targeting TSC1. *Journal of cellular and molecular medicine*.  
465 2014;18(11):2266-74.
- 466 42. van Almen GC, Verhesen W, van Leeuwen RE, van de Vrie M, Eurlings C, Schellings MW, et al.  
467 MicroRNA-18 and microRNA-19 regulate CTGF and TSP-1 expression in age-related heart failure. *Aging*  
468 *cell*. 2011;10(5):769-79.
- 469 43. Qin D-N, Qian L, Hu D-L, Yu Z-B, Han S-P, Zhu C, et al. Effects of miR-19b overexpression on  
470 proliferation, differentiation, apoptosis and Wnt/ $\beta$ -catenin signaling pathway in P19 cell model of  
471 cardiac differentiation in vitro. *Cell biochemistry and biophysics*. 2013;66(3):709-22.
- 472 44. Faccini J, Ruidavets J-B, Cordelier P, Martins F, Maoret J-J, Bongard V, et al. Circulating miR-155,  
473 miR-145 and let-7c as diagnostic biomarkers of the coronary artery disease. *Scientific Reports*. 2017;7.
- 474 45. Chen X-M, Splinter PL, O'Hara SP, LaRusso NF. A cellular micro-RNA, let-7i, regulates Toll-like  
475 receptor 4 expression and contributes to cholangiocyte immune responses against *Cryptosporidium*  
476 *parvum* infection. *Journal of Biological Chemistry*. 2007;282(39):28929-38.

477

478

479

Relative fold change in mRNA level

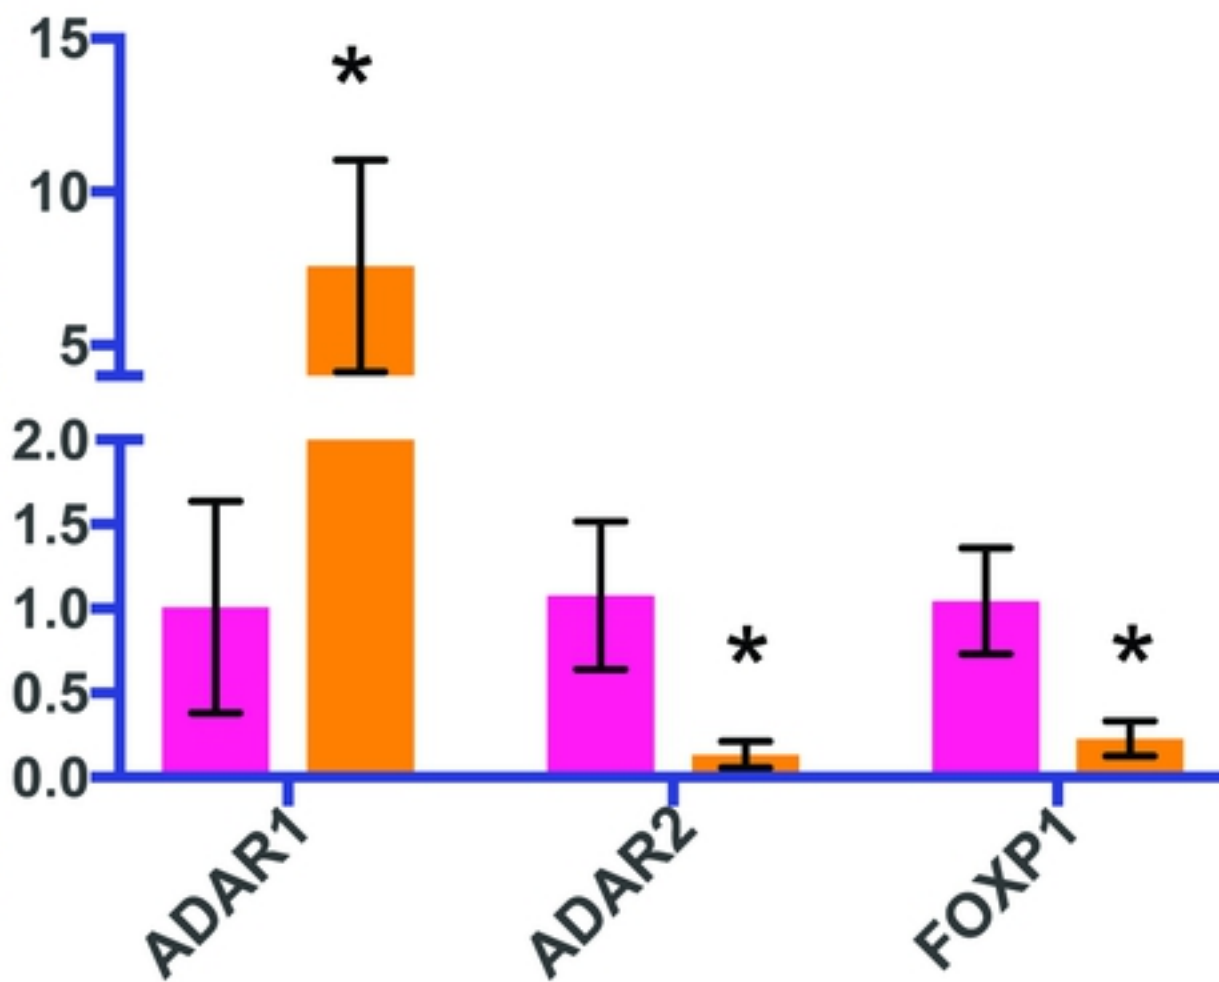

CONTROL  
AFFECTED



### ADAR1 expression

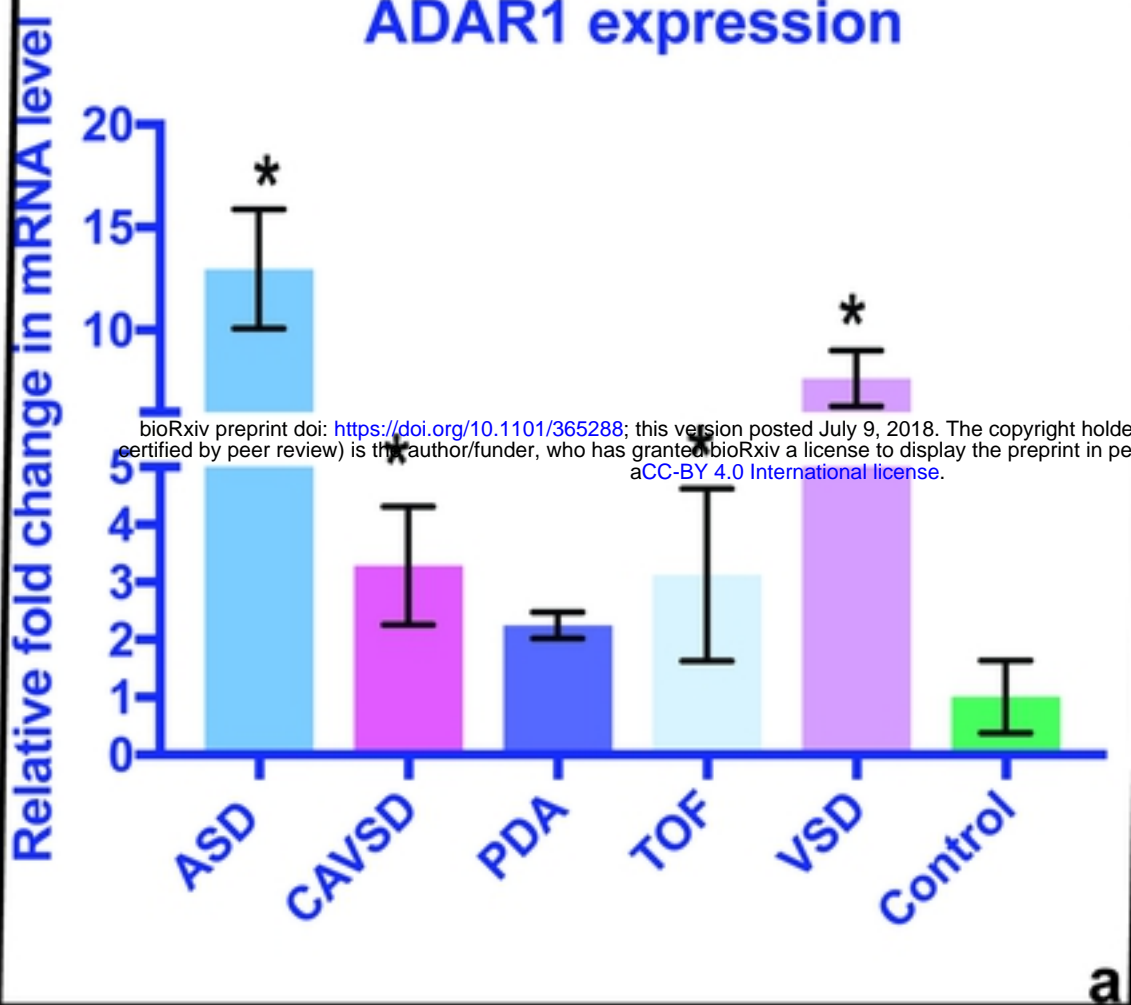

a

### FOXP1 expression

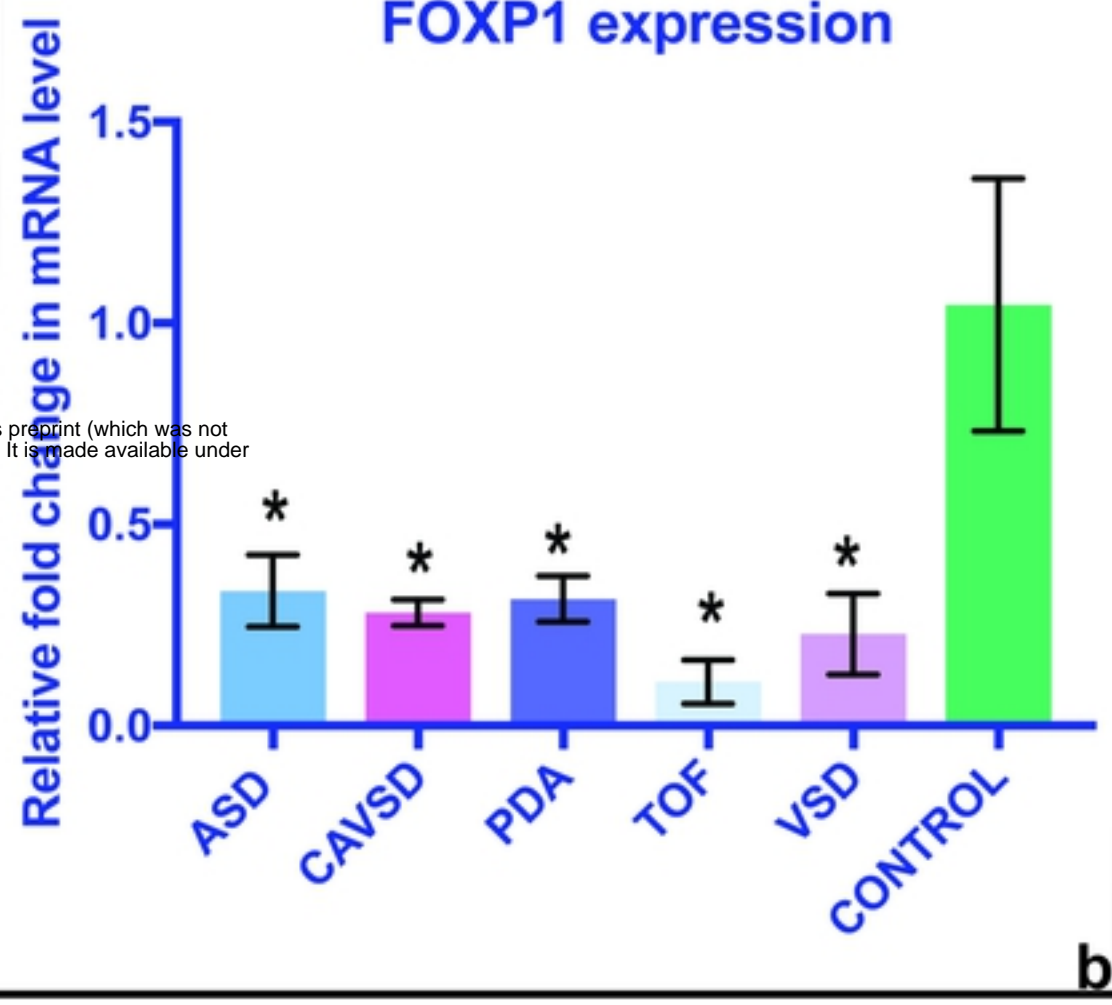

b

### ADAR2 expression

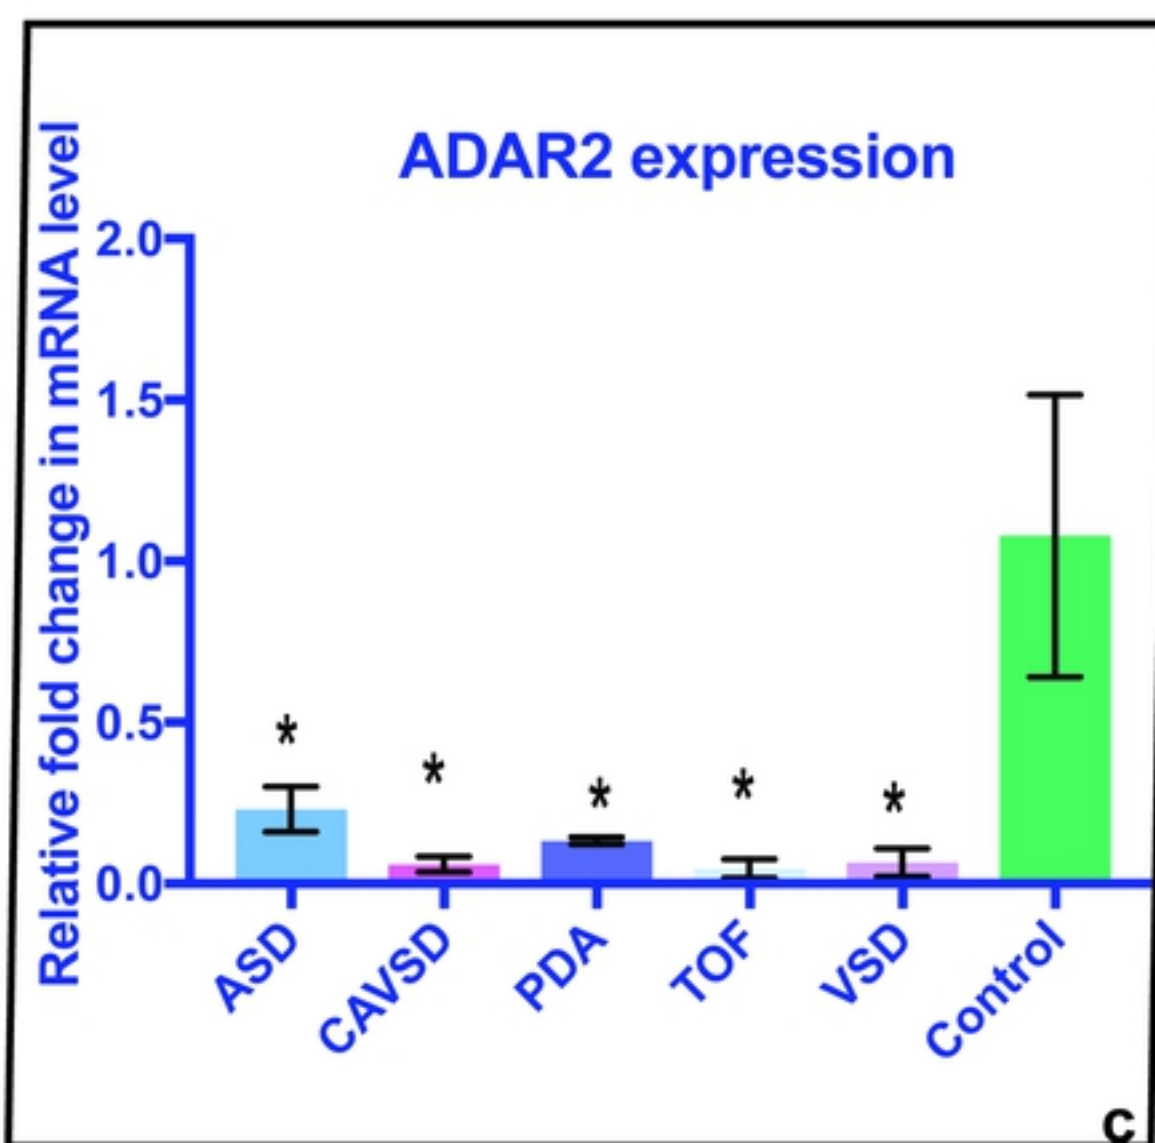

c

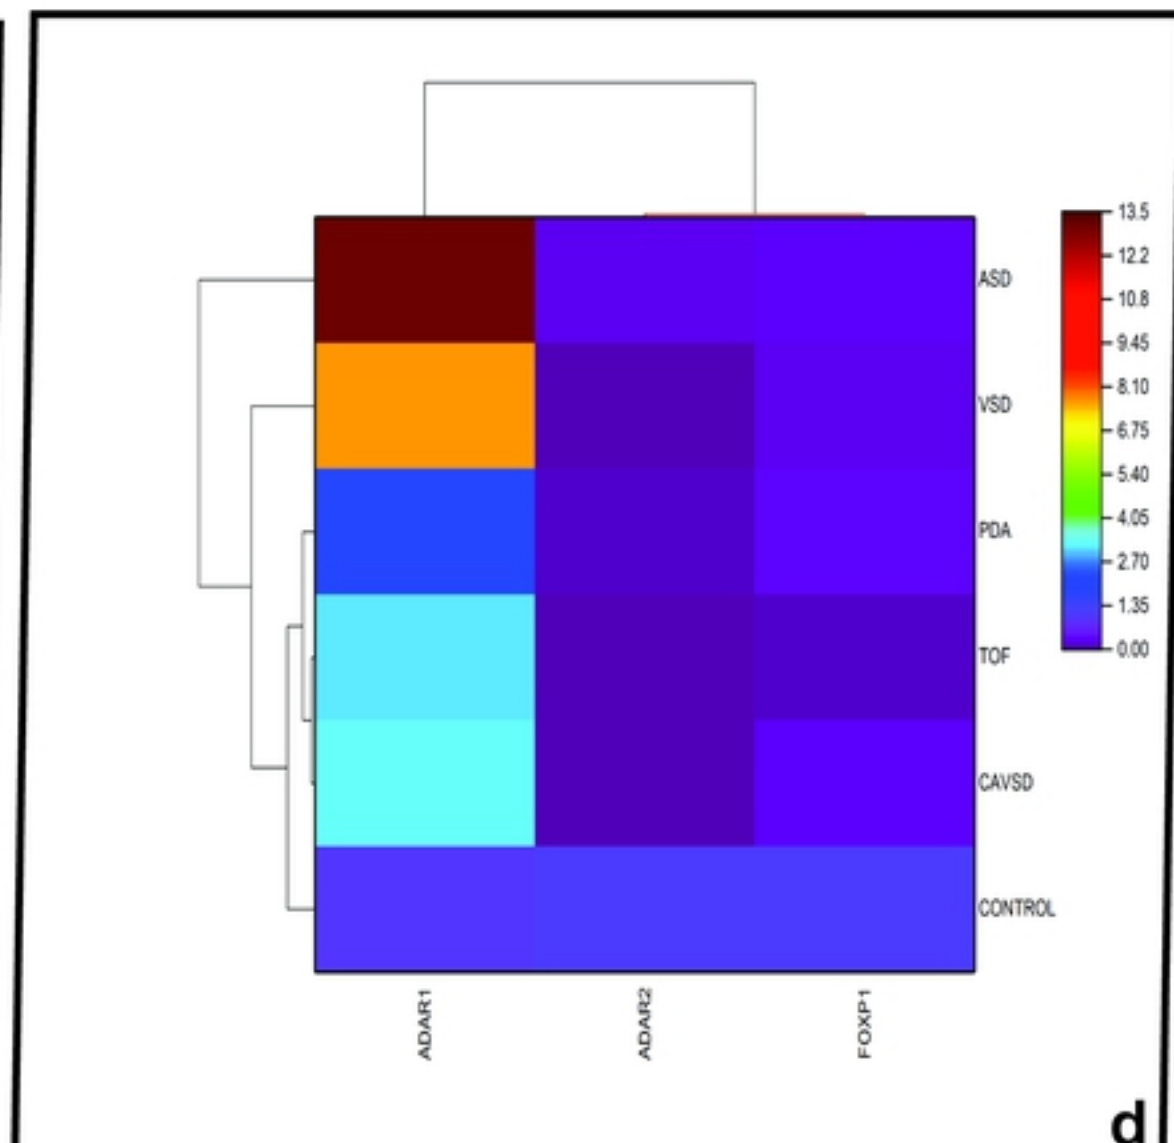

d

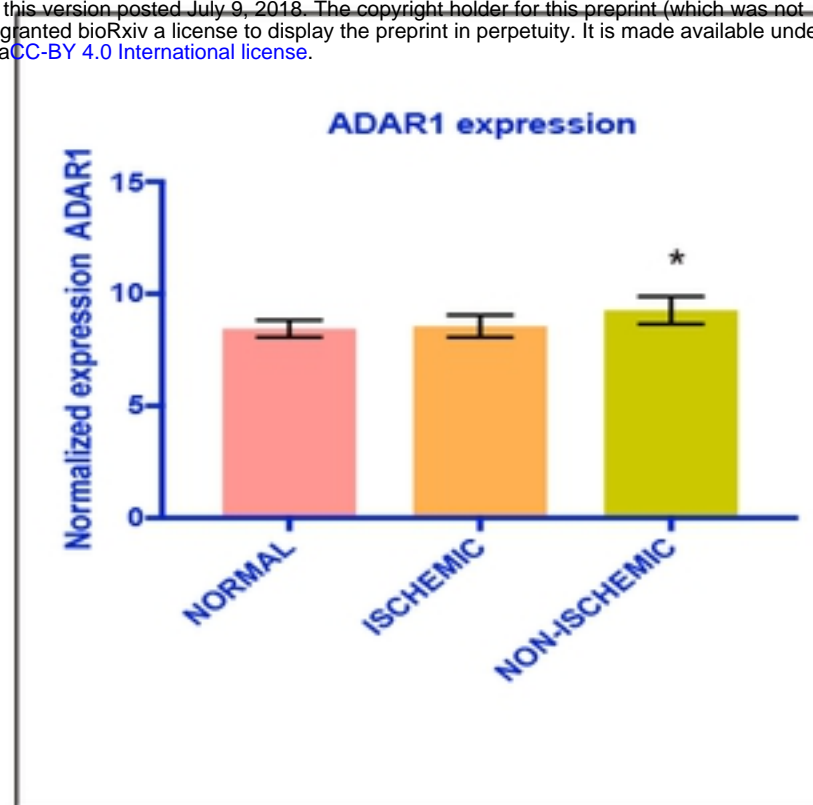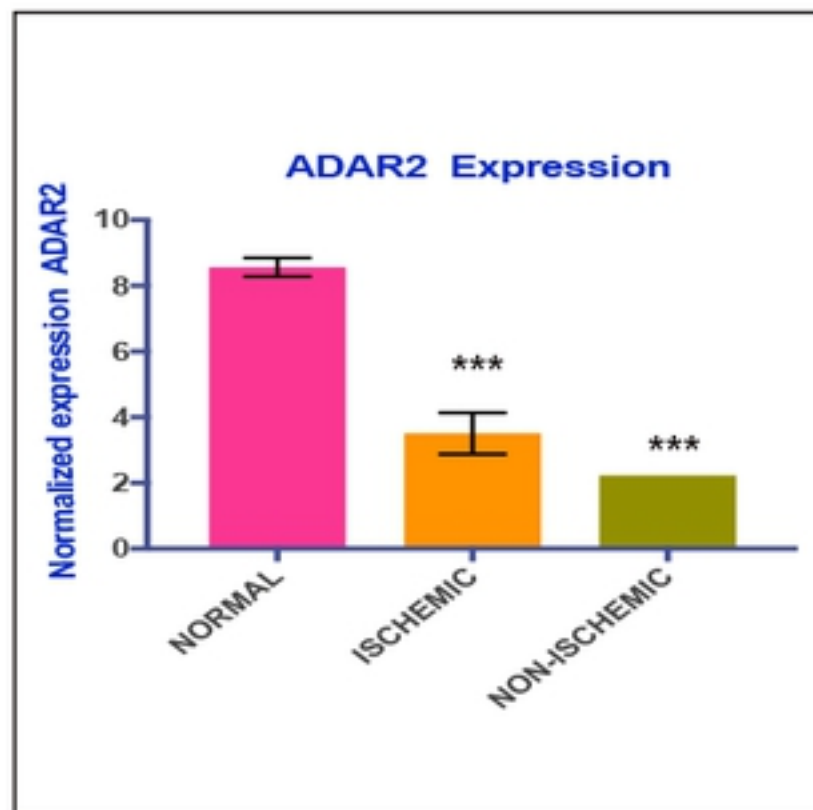



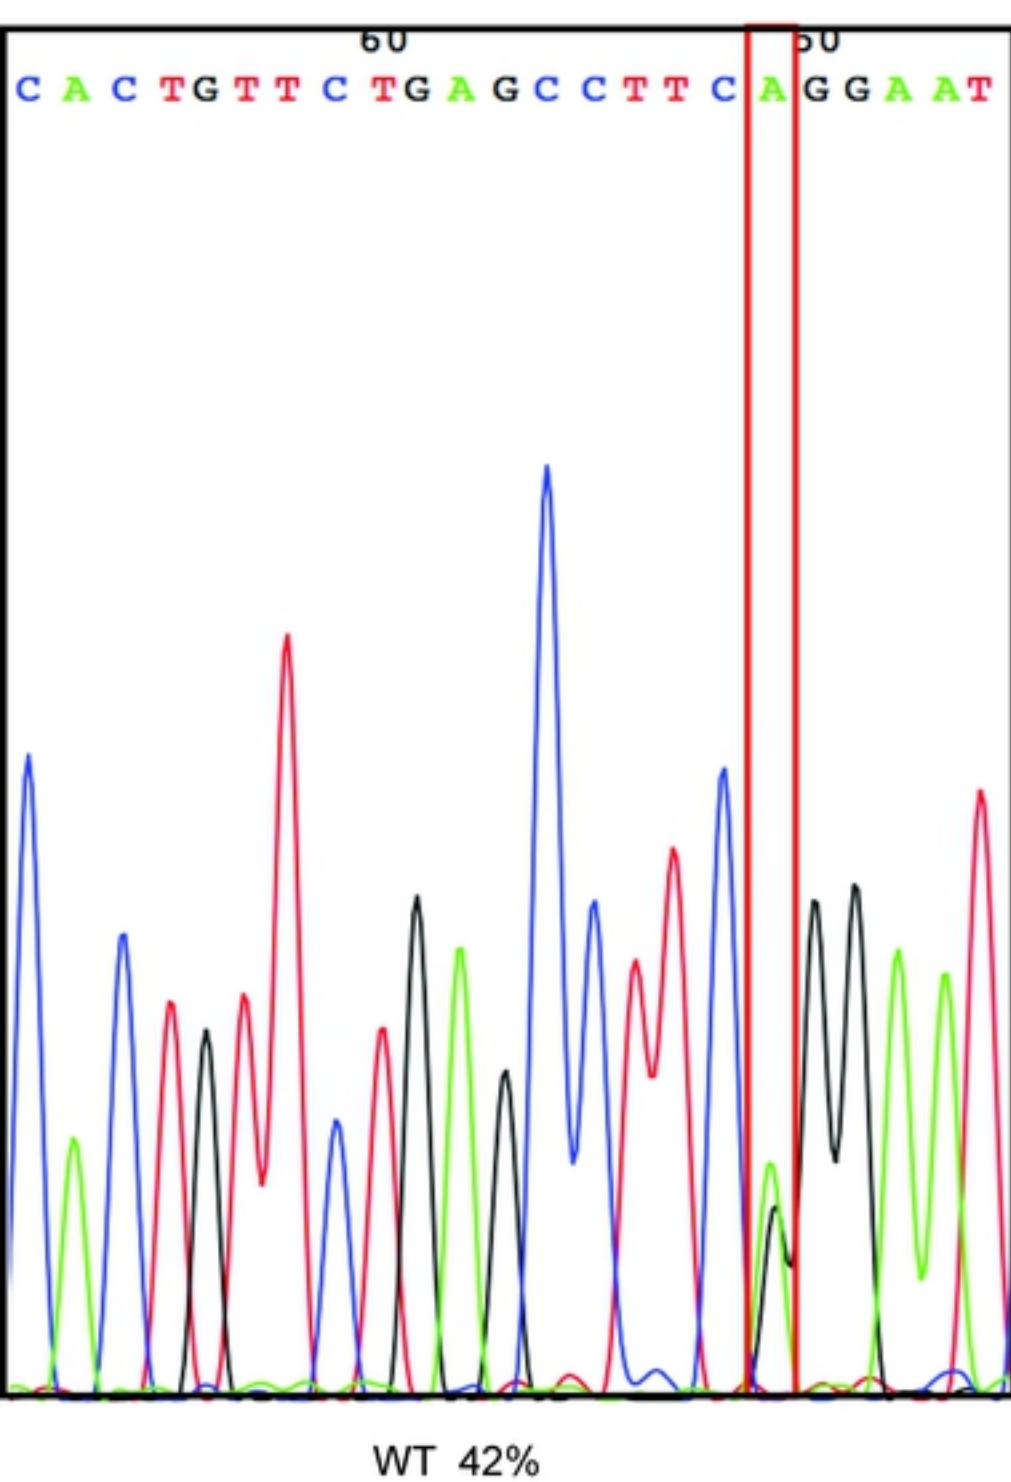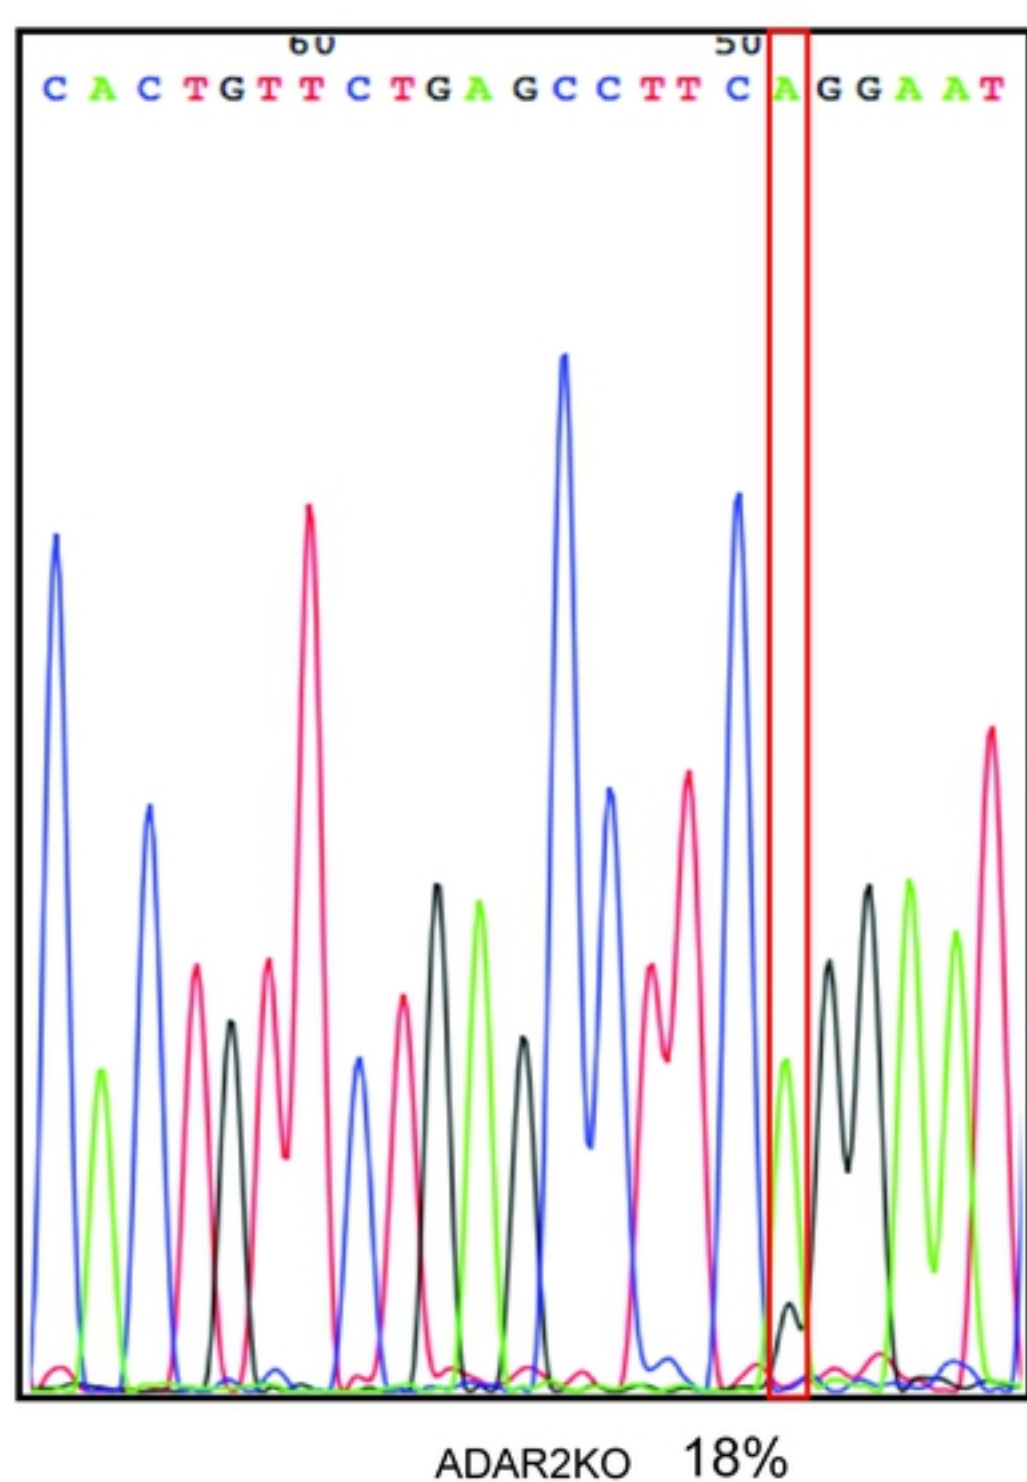

## FLNB expression

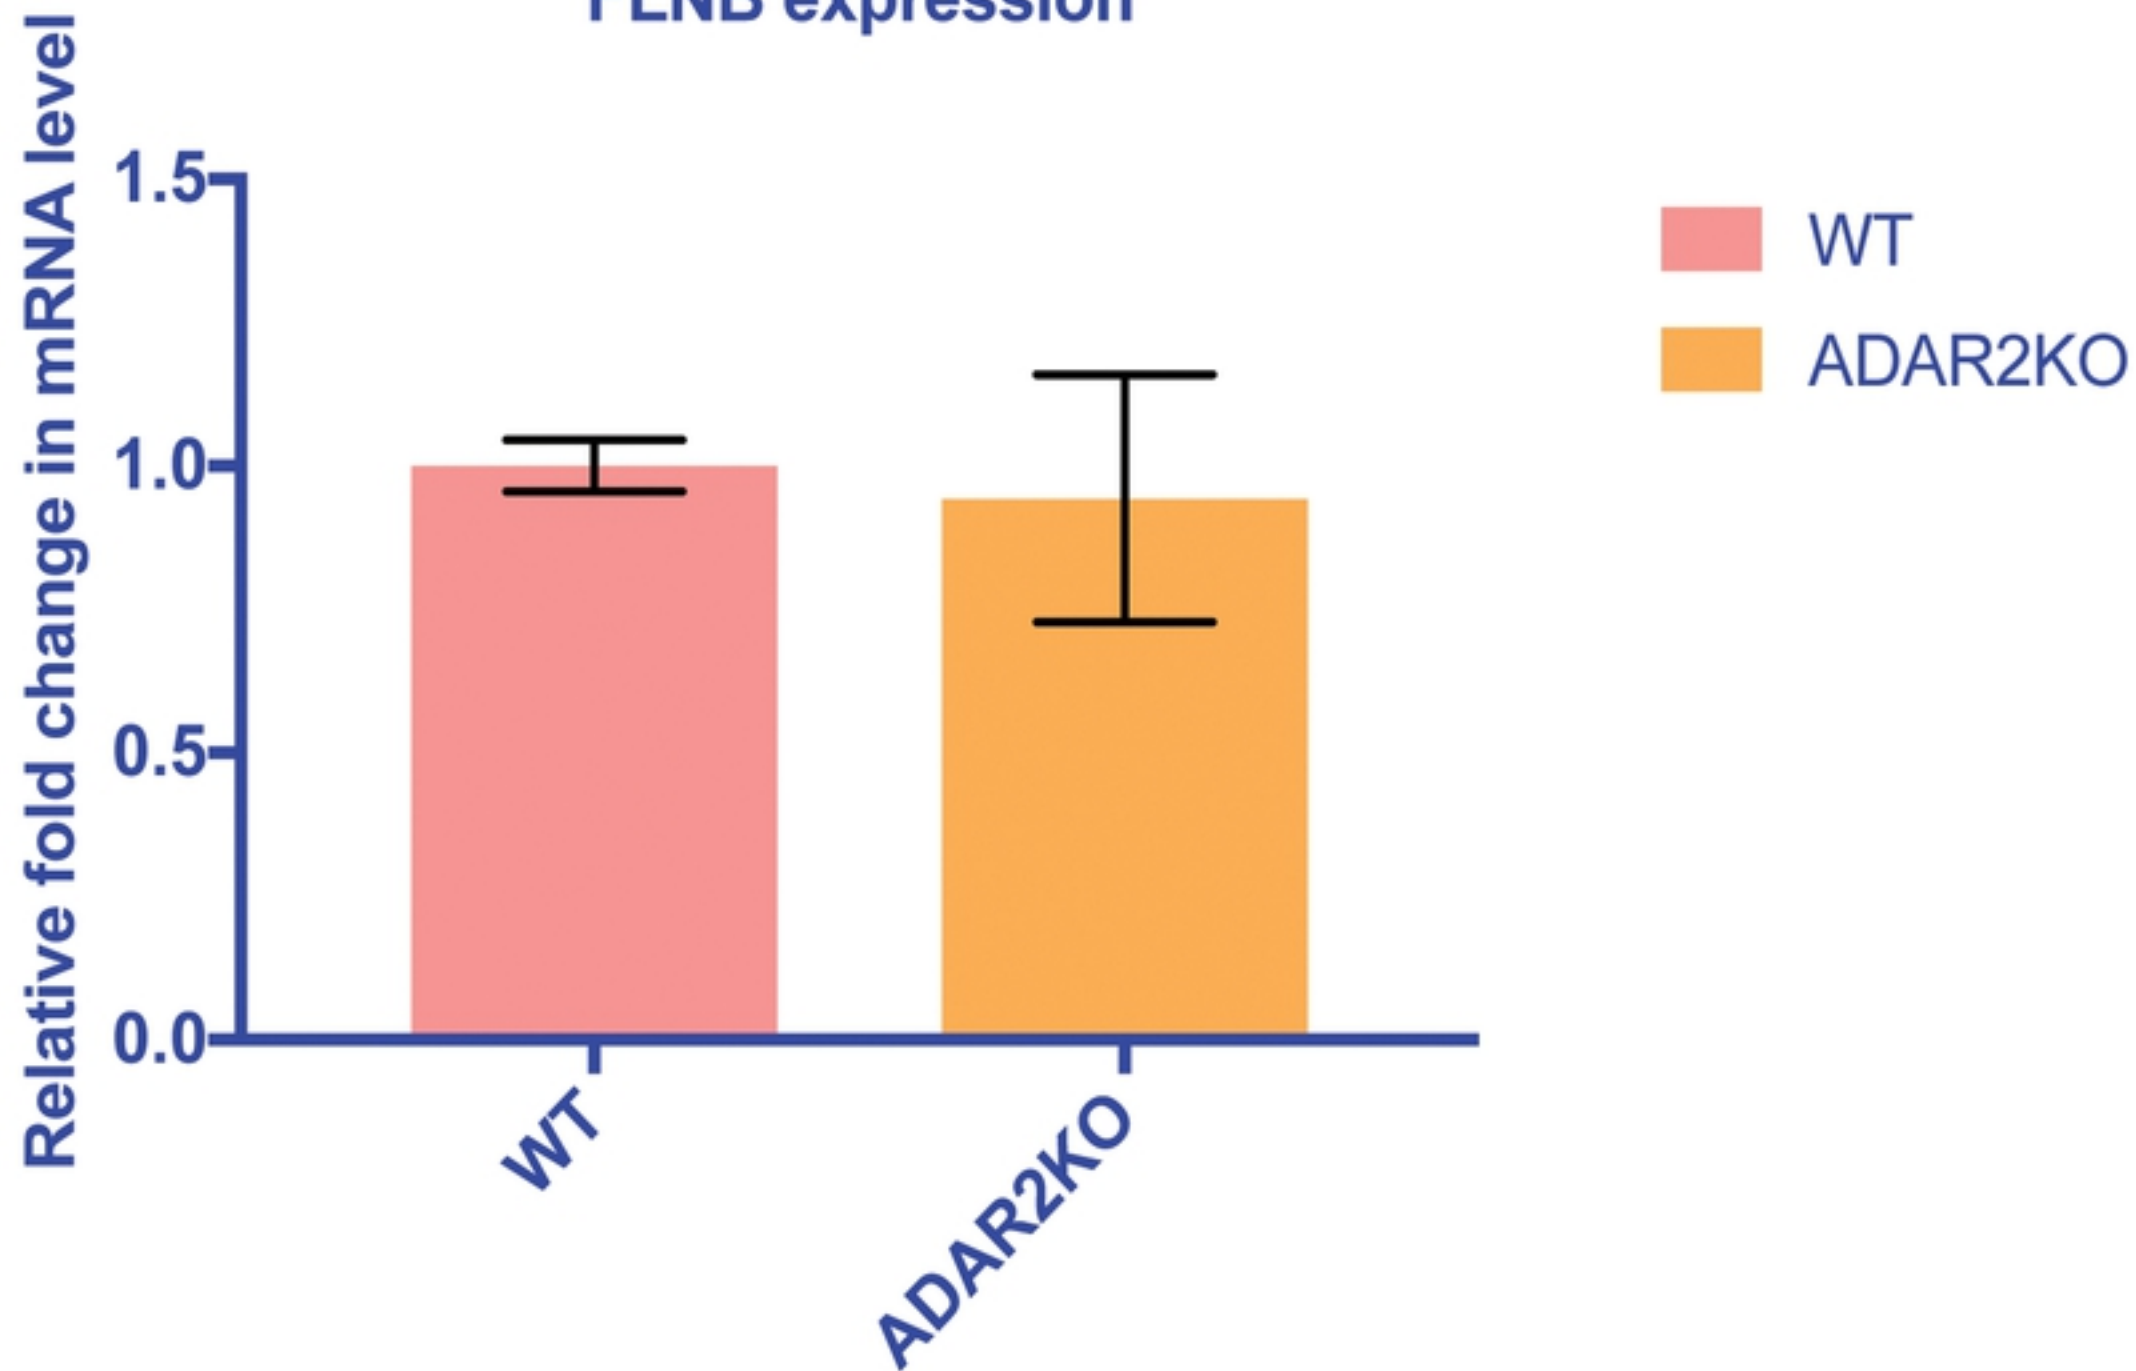

## ADAR1 expression

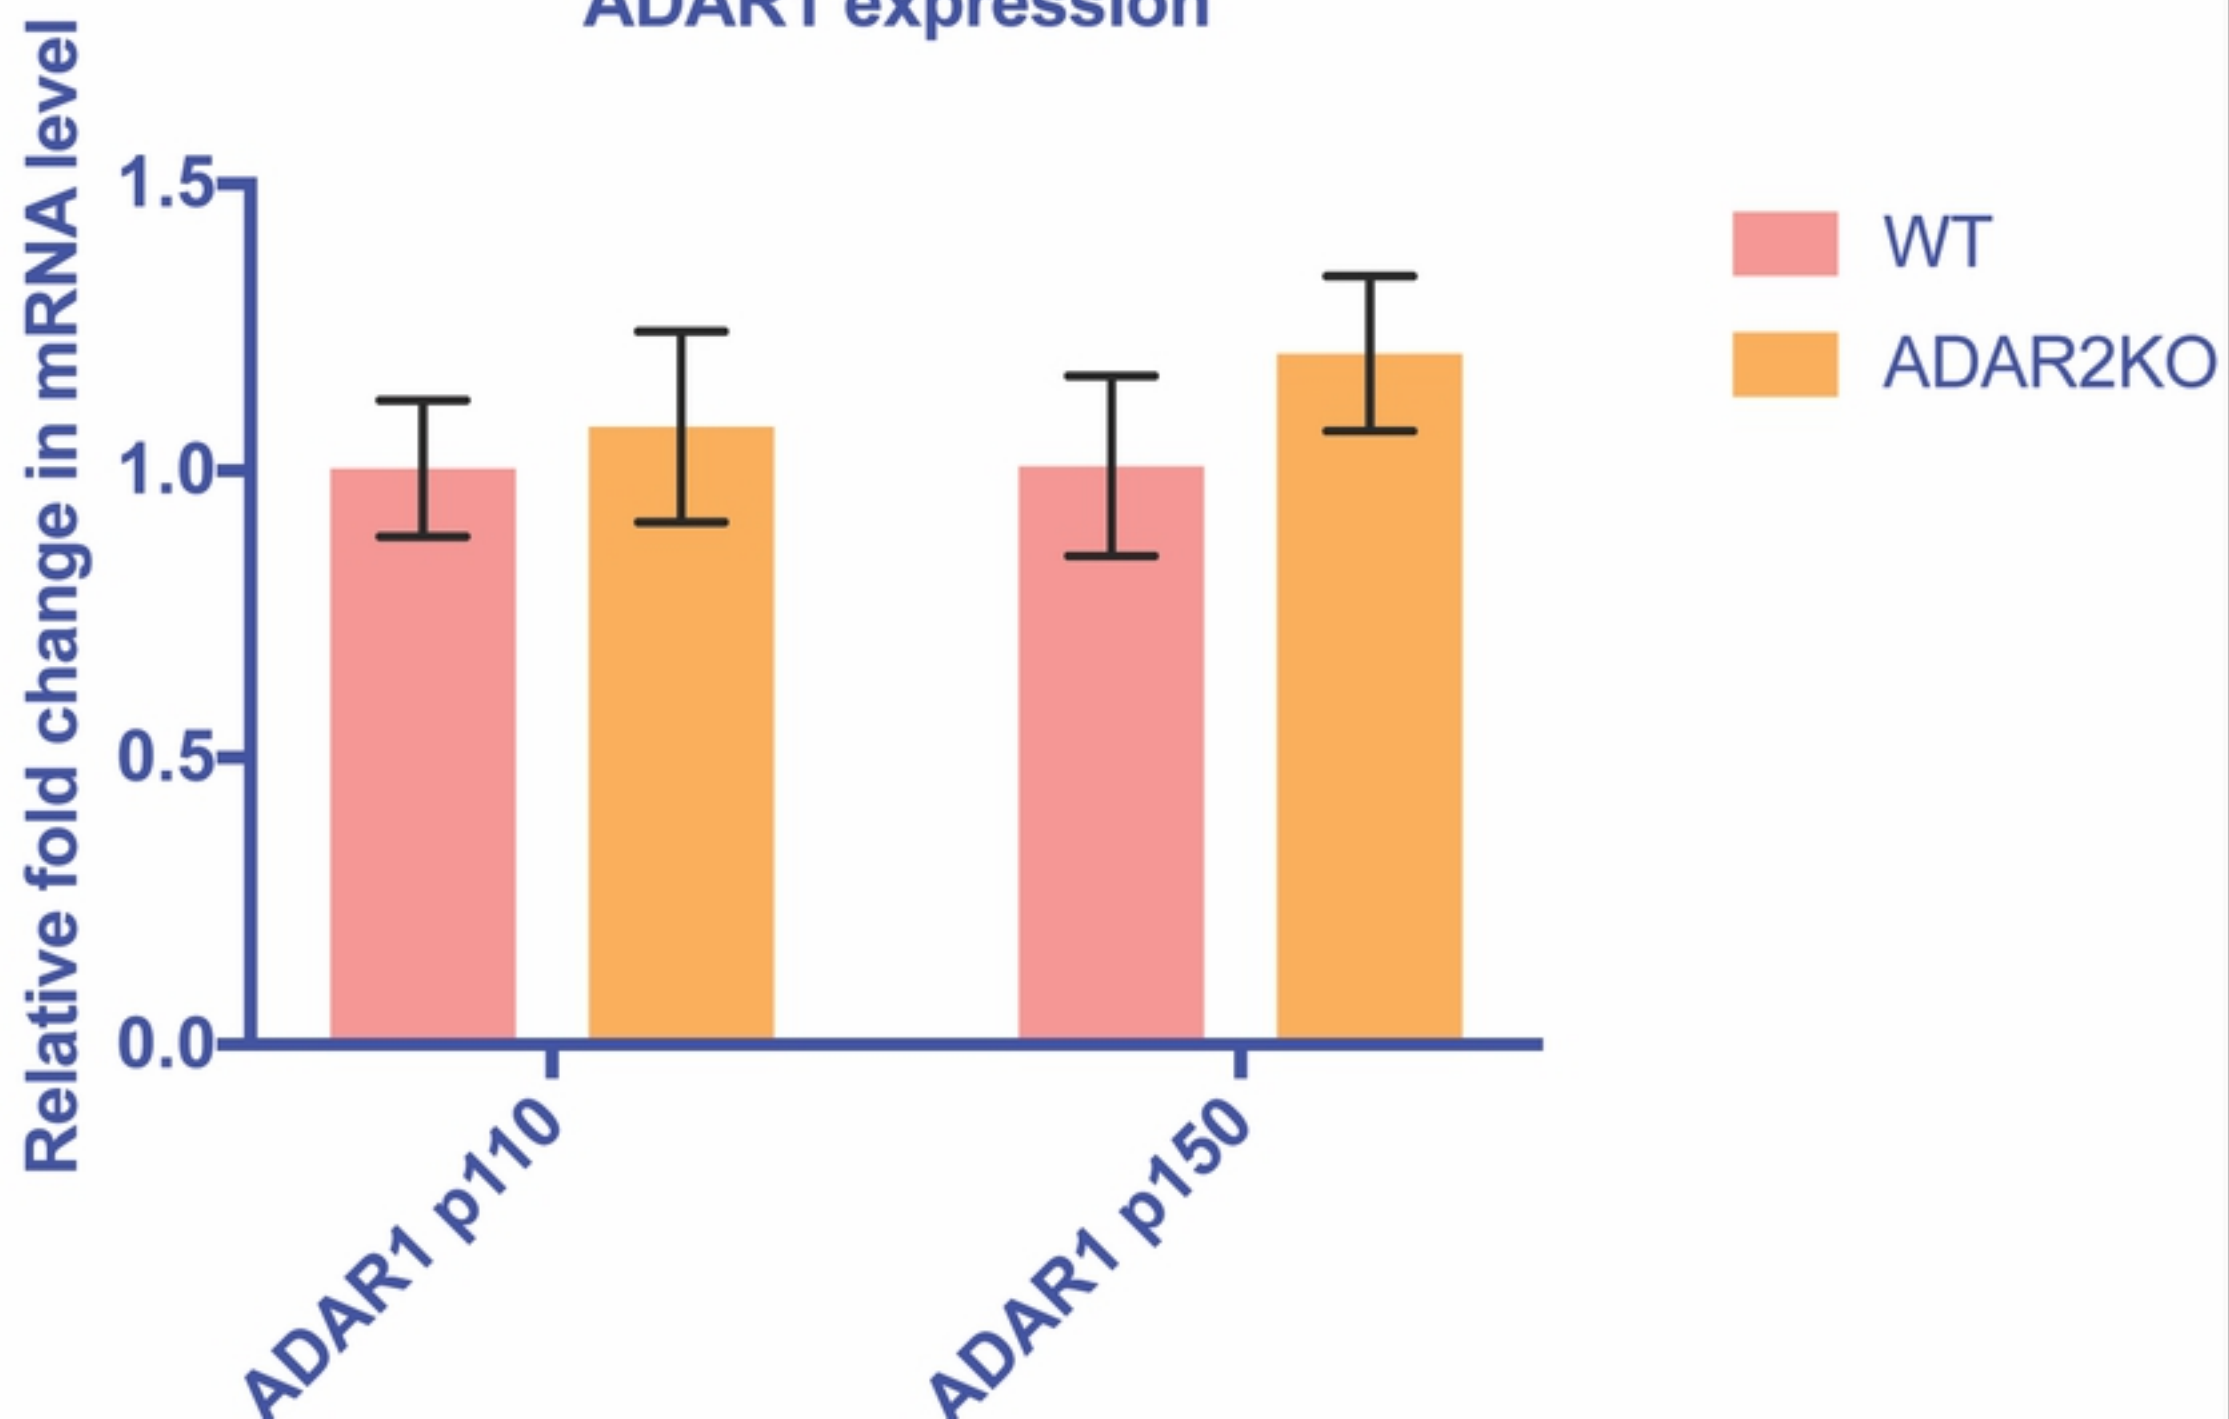

Source: http://biorxiv.org/content/10.1101/365288v1.full.pdf
